1 **Microbiome restructuring: dominant coral bacterium *Endozoicomonas* species**  
2 **display differential adaptive capabilities to environmental changes**

3 **Kshitij Tandon<sup>1#</sup>, Yu-Jing Chiou<sup>1#</sup>, Sheng-Ping Yu<sup>1#</sup>, Hernyi Justin Hsieh<sup>2</sup>, Chih-**  
4 **Ying Lu<sup>1,3,4</sup>, Ming-Tsung Hsu<sup>1</sup>, Pei-Wen Chiang<sup>1</sup>, Hsing-Ju Chen<sup>1</sup>, Naohisa Wada<sup>1</sup>,**  
5 **Sen-Lin Tang<sup>1,3\*</sup>**

6 <sup>1</sup> Biodiversity Research Center, Academia Sinica, Taipei 115, Taiwan

7 <sup>2</sup> Penghu Marine Biology Research Center, Fisheries Research Institute, Council of  
8 Agriculture, Penghu 880, Taiwan

9 <sup>3</sup> Molecular and Biological Agricultural Sciences Program, Taiwan International  
10 Graduate Program, National Chung Hsing University, and Academia Sinica, Taipei,  
11 Taiwan

12 <sup>4</sup> Graduate Institute of Biotechnology, National Chung Hsing University, Taichung,  
13 Taiwan

14 \* Corresponding author

15 Corresponding author email: [sltang@gate.sinica.edu.tw](mailto:sltang@gate.sinica.edu.tw)

16 # These authors contributed equally to the work.

17

18 Running Title: Differential adaptive capability of *Endozoicomonas* species

19

20

21 **Abstract**

22 Bacteria in the coral microbiome play a crucial role in determining coral health  
23 and fitness, and the coral host often restructures its microbiome composition in  
24 response to external factors. An important but often neglected factor determining  
25 this microbiome restructuring is the capacity of microbiome members to adapt to  
26 a new environment. To address this issue, we examined how the microbiome  
27 structure of *Acropora muricata* corals changed over 9 months following a  
28 reciprocal transplant experiment. Using a combination of metabarcoding,  
29 genomics, and comparative genomics approaches, we found that coral colonies  
30 separated by a small distance harbored different dominant *Endozoicomonas*  
31 *related phylotypes belonging to two different* species, including a novel species,  
32 *Candidatus Endozoicomonas penghunesis* 4G, whose chromosome level  
33 (complete) genome was also sequenced in this study. Furthermore, the two  
34 dominant *Endozoicomonas* species showed varied adaptation capabilities when  
35 coral colonies were transplanted in a new environment. The differential  
36 adaptation capabilities of dominant members of the microbiome can a) provide  
37 distinct advantages to coral hosts when subjected to changing environmental  
38 conditions and b) have positive implications for future reefs.

39 **Keywords:** Microbiome restructuring, adaptive capability, coral-associated

40 bacteria, Endozoicomonas, reciprocal transplant

41

## 42 **Introduction**

43 Bacteria are one of the main microbial partners in the coral holobiont [1]. They  
44 may play a role in coral health, disease, and nutrient supply [2, 3]. A coral colony  
45 often accommodates several hundred, if not thousands, of bacterial phylotypes  
46 [4, 5], with different bacterial communities residing in coral compartments such  
47 as the coral mucus [6–8], tissue [6, 7, 9, 10], gastrovascular cavity [11], and  
48 skeleton [12–14]. These bacterial communities are often diverse, dynamic, and—  
49 according to many studies—profoundly influenced by factors such as host  
50 specificity and spatiotemporal changes in the surrounding environment [9, 15–  
51 19].

52 Of the factors involved in restructuring the coral-associated bacterial  
53 community, environmental changes and host specificity are two major drivers  
54 influencing the composition of the bacterial community in corals. In terms of  
55 environmental changes, numerous studies have reported shifts in the bacterial  
56 community composition of corals in response to variations in temperature [20–  
57 24], nutrient load [21, 25], exposure to pathogens [26], and anthropogenic factors  
58 [21, 27]. Regarding host specificity, the same coral species living in habitats  
59 hundreds to thousands of kilometers apart were found to accommodate similar  
60 bacterial community profiles [1, 28], whereas adjacent corals colonies of different

61 species had distinct microbiomes [1, 29]. Interestingly, several studies have  
62 asserted that changes to the coral microbiome composition in response to new  
63 environments are host-specific; this was tested via transplantation experiments  
64 and suggests that microbiome alteration is a potential acclimatization strategy  
65 [22, 30]. This microbiome alteration potential is known to vary depending on the  
66 host species. For example, Ziegler and coworkers [30] studied variation in the  
67 microbiomes of the corals *Acropora hemprichii* and *Pocillopora verrucosa* in a  
68 long-term cross-transplantation experiment and identified that *A. hemprichii*  
69 harbors a highly flexible microbiome, whereas *P. verrucosa* has a remarkably  
70 stable microbiome, even after exposure to different levels of chronic pollution,  
71 suggesting that the bacterial communities of different coral species vary.

72         In most of the studies conducted to date, factors influencing the changes in  
73 the coral-associated bacterial community are often external, such as those  
74 mentioned above. Only recently have internal factors like host genotype been  
75 shown to also influence the coral microbiome [31]. However, the adaptation  
76 capability of bacteria, one hidden but crucial internal factor, has long been  
77 neglected. Theoretically, based on the nature of genetic variations among  
78 bacteria, some bacterial phylotypes of the same bacterial group in a community  
79 may perform better than others under specific environmental conditions due to

80 higher adaptation capabilities. Therefore, those bacteria phylotypes with higher  
81 adaptation capacities could maintain a more stable abundance profile during  
82 specific environmental changes and potentially play important functional roles. In  
83 other words, along with host selection and environmental influence, changes in  
84 the bacterial community may be greatly affected by the adaptation capacities of  
85 individual bacterial groups. However, this aspect of microbiome restructuring is  
86 mostly unexplored.

87 To test the above hypothesis that bacterial groups have different  
88 adaptation capabilities, we first needed to identify a dominant bacterial group  
89 often identified in corals with multiple operational taxonomic units (OTUs) or,  
90 more recently, amplicon sequence variants (ASVs) from metabarcoding surveys.  
91 One such group belongs to the genus *Endozoicomonas* (Phylum: *Proteobacteria*,  
92 Class: *Gammaproteobacteria*, Order: *Oceanospiralles*, family:  
93 *Endozoicomonadecea* (also *Hahellacea*)), a dominant bacterial group found in  
94 several coral species [32, 33]; it plays a role in coral health and nutrition  
95 regulation [34]. In a recent study from our group, Shiu et al. [23] that the  
96 abundance profiles of certain *Endozoicomonas* OTU shifted within 12 hours under  
97 thermal stress. If *Endozoicomonas* does have a differential adaptation capability,  
98 then we can hypothesize that different *Endozoicomonas* phylotypes behave

99 differently and some may remain more stable and colonize longer than others  
100 when corals are subjected to environmental change. Another prerequisite to  
101 testing the differential capability of bacterial phylotypes is finding a region with  
102 differential environmental conditions within a small distance such that  
103 geographical variation does not influence the coral microbiome.

104         The Penghu Archipelago, located in the Taiwan Strait, has been proposed to  
105 be a climate-change refugium for corals and has a unique thermal regime,  
106 governed by the warm Kuroshio Current in the summer and cold China Coastal  
107 Current in the winter [23, 35]. These factors make it an ideal location for an  
108 experimental site. The semi-closed Chinwan Inner Bay (hereafter “Inner Bay”) of  
109 Penghu has suffered substantial marine biodiversity losses, including significant  
110 damage to marine aquaculture, wild fisheries, and coral bleaching due to extreme  
111 weather events in the winter [36]. Furthermore, based on regional news and  
112 government reports, domestic sewage dumping, the presence of a shipping port,  
113 and aquaculture practices have increased the concentrations of nitrogen and  
114 ammonia in the calmer waters of the Inner Bay compared to the Outer Bay  
115 region, threatening corals. The contrasting local environmental conditions  
116 between the Inner and Outer Bays make them excellent sites to study the  
117 response of locally acclimated coral microbial communities (especially for

118 *Endozoicomonas*), trace coral microbiome restructuring at a fine scale, and test  
119 the differential adaptability hypothesis of dominant coral-associated bacteria.

120 We examined how the microbial community restructures in response to  
121 changes in the local environment and tested the hypothesis that *Endozoicomonas*  
122 phylotypes have a differential adaptation capacity using colonies of the coral  
123 *Acropora muricata* (genus: *Acropora*) in the Penghu Archipelago, Taiwan. These  
124 coral species in the Penghu Archipelago have been reported to harbor  
125 *Endozoicomonas* as their dominant bacteria [23]. We conducted a longitudinal (9-  
126 month) *in situ* reciprocal transplant experiment with repeated sampling, where  
127 coral colonies from the semi-closed Inner Bay were transplanted into the open  
128 ocean region of the Outer Bay and vice versa. Furthermore, we aimed to isolate,  
129 culture, and characterize dominant *Endozoicomonas* members to provide  
130 genomic insights into how bacteria adapt to these environments.

## 131 **Materials and methods**

### 132 **Study design and experimental setup**

133 Five colonies of *Acropora muricata* (40×40 cm) were collected at a depth of  
134 3 m from the Outer Bay (O) (N23° 33.097' E119° 38.335') and Inner Bay (I) (N23°  
135 31.853' E119° 33.629') along the reef adjacent to the coast of the Penghu



136 Archipelago, Taiwan (Figure 1A). Mother coral colonies were first collected in  
137 April. These acted as controls for the native coral microbiome in the study sites  
138 (Figure 1A). Later, mother colonies were fragmented into two halves (approx.  
139 20x20 cm each). Coral fragments from mother colonies were either cross  
140 swapped (I→O or O→I) or transplanted in their original location (IC or OC) (Figure  
141 1B). Coral fragments from each colony that remained in their original location  
142 acted as controls to measure any change in the microbiome due to the transplant  
143 procedure and change in the microbiome based on colony age and experimental  
144 time. Coral fragments were glued onto the reef with epoxy putty.

#### 145 **Sampling timeline and sample collection**

146 Study sites were visited every month from April to August 2018 and then in  
147 December 2018 to check the status of transplanted fragments and collect  
148 samples. In total, we collected 122 samples, including seawater samples (1 L) at  
149 each time-point and location. 2x2 cm fragments were taken from each colony,  
150 rinsed with filtered seawater, and stored in 99% ethanol at -20°C before DNA  
151 extraction.

#### 152 **DNA extraction and 16S rRNA gene amplicon sequencing**

153 Frozen coral fragments were sprayed (70 psi) with ~15 ml 1x TE buffer (10  
154 mM Tris-HCl, 1 mM EDTA, pH 8), then placed into sterile zip lock bags. Total DNA  
155 was extracted using a modified CTAB method [37]. Coral tissue samples DNA was  
156 extracted with conventional Chloroform/isoamyl alcohol (24:1) and  
157 phenol/chloroform/isoamyl alcohol (25:24:1) step and isopropanol precipitation  
158 method. The DNA pellet was rinsed with 70% ethanol and then dissolved in 50  $\mu$ l  
159 ddH<sub>2</sub>O and stored at -20°C. DNA concentration was determined using a NanoDrop  
160 1000 Spectrophotometer (Thermo Fisher Scientific, Waltham, MA, USA) and  
161 Quant-iT dsDNA HS (High-Sensitivity) Assay Kit. Seawater samples were processed  
162 similarly with the modified CTAB method [37].

163 For DNA library construction, 968F (5'-AAC GCG AAG AAC CTT AC-3') [38]  
164 and 1391R (5'-ACG GGC GGT GWG TRC-3') [39] universal primers were used to  
165 amplify the bacterial V6-V8 hypervariable region of the 16S rRNA gene from the  
166 total DNA from samples using PCR. For PCR reactions, 50–150 ng of template DNA  
167 were used. PCR was performed in 50  $\mu$ l reaction volumes, consisting of 1.5 U  
168 *TaKaRa Ex Taq* (Takara Bio, Otsu, Japan), 1X *TaKaRa Ex Taq* buffer, 0.2 mM  
169 deoxynucleotide triphosphate mixture (dNTPs), 0.2 mM forward and reverse  
170 primers, and template DNA. The PCR conditions consisted of an initial denaturing  
171 step at 95°C for 5 min; followed by 30 cycles at 94°C for the 30 s, 52°C for 20 s and

172 72°C for 45 s; and a final extension at 72°C for 10 min. The amplified product was  
173 visually confirmed using 1.5% agarose gel with a 5 µl PCR product. Target bands  
174 (~420 bp) were cut and eluted using a QIAEX II gel extraction kit (Qiagen, Valencia,  
175 CA, USA).

176 Each bacterial V6-V8 amplicon was tagged with a unique barcode sequence  
177 by designing tag primers with 4-base overhangs at 5' ends. The sample-specific  
178 tagging reaction was performed with a 5-cycle PCR, with a reaction program of  
179 initial denaturation at 94°C for 3 min, followed by denaturation at 94°C for 30 s,  
180 annealing at 52°C for 20 s, extension at 72°C for 45 s, and a final extension at 72°C  
181 for 10 min. The amplified product was purified using the QIAquick PCR  
182 purification Kit (Qiagen, Valencia, CA, USA). Purified products were pooled into  
183 four independent libraries and sequenced with Illumina MiSeq paired-end  
184 sequencing (2x300) at Yourgene Biosciences, Taiwan.

## 185 **Sequence data processing and analysis**

186 Paired-end raw reads obtained from Illumina sequencing were merged  
187 using USEARCH v11 [40] with the parameters minovlen=16, maxdiffs=30, and  
188 pctid=80. Merged reads were sorted, quality-filtered, and trimmed using Mothur  
189 v1.3.81 [41]. Reads 400–470 bp long with an average quality >25 were kept.

190 Chimeric reads were inspected and eliminated with UCHIME [42] by USEARCH  
191 v11. Qualified reads were retained for subsequent analysis. High-quality reads  
192 were denoised using UNOISE3 [43], and zero-radius Operational taxonomic units  
193 (zOTUs)—which are equivalent to exact sequence variants—were obtained. The  
194 denoised sequences were aligned against the SILVA128 [44, 45] ribosomal RNA  
195 database for a taxonomic assignment up to the genus level using Mothur on a  
196 per-sample basis with a pseudo-bootstrap cutoff of 80%.

## 197 **Statistical analyses**

198 All statistical analyses and graphs were generated in R (R Core Team 2020).  
199 Stacked bar plots were obtained by converting absolute abundance profiles into  
200 relative abundances. Abundance profiles were processed with the R packages  
201 phyloseq [46], vegan [47], ggplot2 [48], pheatmap [49], and microbiomeMarker  
202 [50] for downstream analyses and visualization. Alpha diversity analysis was  
203 conducted after rarifying the samples to an even depth of 5,704 reads using the  
204 `estimate_richness` function from phyloseq. Alpha diversity metrics were  
205 compared using Analysis of Variance (ANOVA) and Tukey's post hoc tests using  
206 vegan package *p*-value correction for multiple testing. Multivariate analysis was  
207 performed after square-root transforming the zOTUs count data. Betadisper

208 function was used to calculate the multivariate dispersion of samples (Bray-Curtis  
209 distance) between sample groups. Homogeneity of multivariate dispersion was  
210 tested with ANOVA. Non-multidimensional scaling (nMDS) was performed to  
211 compare community compositions using the Bray-Curtis distance metric between  
212 sample groups. Permutational multivariate analysis of variance (PERMANOVA)  
213 with the “adonis” function (with 9,999 permutations) was used to statistically test  
214 for differences in community compositions between the back and cross transplant  
215 samples for each location as dispersion was significantly different between  
216 groups. Linear discriminant analysis Effect Size (LEfSe) implemented in the  
217 microbiomeMarker package in R was used to identify shifts in zOTUs between  
218 back and cross transplant samples for each location with a log(LDA) cutoff of 3  
219 (Kruskal-Wallis test:  $p < 0.05$ ). z-score transformed abundance profiles of marker  
220 zOTUs identified from LEfSe were visualized with a heatmap via pheatmap.

## 221 **Environmental parameters**

222 The water temperatures of the Outer (O) and Inner (I) Bay of the Penghu  
223 Archipelago, Taiwan were obtained from May 2018 through to December 2018  
224 using temperature data loggers (HOBO® Pendant, Onset Corp, United States)  
225 located at ~3m deep, close to target colonies, and recording temperatures every

226 30 min. Abiotic factors including NH<sub>3</sub>, NO<sub>3</sub>, and PO<sub>4</sub> were measured with LaMotte  
227 1910 SMART<sup>®</sup> 3 Colorimeter; pH was measured with a HORIBA LAQUA act water  
228 quality meter; and salinity was measured with an ATAGO master refractometer.

229

## 230 **Bacteria isolation and culturing**

231 *Ca. Endozoicomonas penghunesis* 4G was isolated from the coral *Acropora*  
232 *muricata* off the coast of the Inner Bay, Penghu Archipelago, Taiwan (GPS  
233 location: N23° 31.851' E119° 33.631'). Coral tissue and mucus were sprayed with  
234 TE buffer (10 mM Tris-HCl, 1 mM EDTA, pH 8) and serially diluted to 10<sup>-4</sup>. All  
235 dilutions were plated on Modified Marine Broth version 4 (MMBv4 agar) (Ding et  
236 al. 2016) and incubated at 25°C. Each colony was screened first by the following  
237 primers: bacterial universal forward 27F (5'-AGA GTT TGA TCM TGG CTC AG-3')  
238 and *Endozoicomonas*-specific reverse En771R (5'-TCA GTG TCA RRC CTG AGT GT-  
239 3') [51]. *Endozoicomonas* sp. 16S rRNA gene V1-V4 region was PCR amplified by  
240 35 cycles with a denaturing step at 94°C for the 30 s, followed by annealing at  
241 54°C for 30 s and an extension step at 72°C for 45 s. PCR product was checked on  
242 a 1.5% agarose gel after electrophoresis. All samples with bands ~750 bp long  
243 were then sub-cultured in MMB medium. Full-length 16S rRNA genes were  
244 amplified by universal bacterial primer 27F (5' – AGA GTT TGA TCC TGG CTC AG-

245 3') and 1541R (5'- AAG GAG GTG ATC CAG CC -3'). The full-length 16S rRNA PCR  
246 reaction was amplified using 30 cycles with a denaturing step at 95°C for 30 s,  
247 annealing at 55°C for 30 s, and a final extension at 72°C for 90 s. Amplified  
248 products with target bands (~1465 bp) were cut and later sequenced by Sanger  
249 sequencing (3730 DNA analyzer, Thermo, USA) from Genomics, Taipei, Taiwan.  
250 Chromatograms obtained were manually checked and sequences were trimmed.  
251 The final length of the high-quality trimmed sequence was ~600 bp. Sequences  
252 with ≤98% identity to 16S rRNA genes of type strains from genus *Endozoicomonas*  
253 were deemed new candidates for novel *Endozoicomonas* species.

## 254 **Physiological characterization**

255 *Ca. E. penghunesis* 4G was cultivated on a Modified Marine broth version 4  
256 (MMBv4 medium) [52] (Table S1) for enrichment and a broad range of  
257 physiological characterizations was performed. The optimum salinity was tested  
258 on MMB medium with NaCl concentrations adjusted as required (0.5% and 1.0 ~  
259 4.0%, w/v, in increments of 1.0%). The growth temperature range was tested at  
260 4°C and 10–40°C (at 5°C intervals). The pH tolerance was determined using the  
261 following buffers: pH 4.0–7.0, HCl; pH 7.0–10.0, and NaOH (at 1.0 pH unit  
262 intervals).

263 Three physiological tests (pH, salinity, and temperature) were measured  
264 based on the turbidity (at OD<sub>600</sub>) of cultures grown at different pH values, NaCl  
265 concentration, and temperatures, respectively. Commercial API 20NE kits  
266 (bioMérieux, France) were used to test the ability to metabolize different carbon  
267 substrates per the manufacturer's protocol. Additional carbon utilization was  
268 evaluated in Modified Marine medium (see details in Table S2). Bacterial motility  
269 was tested in Marine Broth semisolid agar (0.5% agarose). The Gram stain kit  
270 (Fluka, England) was used to distinguish bacterial Gram reactions. Relation to  
271 oxygen was determined after incubating *Ca. E. penghunesis* 4G on MMB agar in  
272 the 2.5L Oxoid AnaroGen system (Thermo, USA) and cultured at 25°C for 7 days.  
273 Oxidase and catalase activity was tested independently by adding 35% H<sub>2</sub>O<sub>2</sub> and  
274 0.1% tetramethyl--phenylenediamine dihydrochloride, respectively. An antibiotic  
275 sensitivity test was performed after spreading bacteria on an MMB plate with  
276 each disc containing different antibiotics (10 µg streptomycin and 10 µg  
277 ampicillin). The results were observed after 5 days of incubation at 25°C, and  
278 sensitivity was measured based on the distance from the discs to the edge of the  
279 clear zone. Bacteria were scored as resistant if the diameter was greater than 2  
280 mm, slightly sensitive if the diameter was 1–2 mm, and resistant otherwise.

## 281 **Morphological characterization**



282           The morphology of *Ca. E. penghunesis* 4G, including colony shape and  
283 color, was observed by a stereomicroscope (Leica EZ4, Germany). General cell  
284 structure and cell Inner structure were studied by transmission electron  
285 microscopy (TEM). The bacterial shape on a single colony was observed by  
286 scanning electron microscopy (SEM). TEM and SEM observations were made after  
287 bacteria were cultured in MMB for 1 day and MMB agar (1.5%) for 3 days,  
288 respectively. Colonies were incubated at 25°C.

289           For the *Ca. E. penghunesis* 4G thin section, bacteria were first centrifuged  
290 at 2500 *g* for 5 minutes and bacterial pellets were collected and fixed in 2.5%  
291 glutaraldehyde and 4% paraformaldehyde in a 0.1 M sodium phosphate buffer  
292 (pH 7.0) at room temperature for 1 h. After three 20-min buffer rinses, the  
293 samples were post-fixed in 1% OsO<sub>4</sub> in the same buffer for 1 hour at room  
294 temperature and then rinsed again as above. Samples were dehydrated in an  
295 alcohol series, embedded in Spurr's resin (EMS, USA), and sectioned with a Leica  
296 EM UC6 ultramicrotome (Leica, Germany). The ultra-thin sections (70–90 nm)  
297 were stained with 5% uranyl acetate in 50% methanol and 0.4% lead citrate in 0.1  
298 N sodium hydroxide. An FEI G2 Tecnai Spirit Twin TEM (FEI, USA) at 80 kilo-volts  
299 for viewing and images were captured with a Gatan Orius CCD camera (Gatan,  
300 USA).

301           The colony of *Ca. E. penghunesis* 4G was observed using cryo-SEM (FEI  
302   Quanta 200 SEM/Quorum Cryo System PP2000TR FEI). The MMBv4 agar plate  
303   containing a single colony of *Ca. E. penghunesis* 4G was sectioned into 1 mm x 1  
304   mm and loaded onto the medium-containing stub, and then frozen with liquid  
305   nitrogen slush. The frozen sample was transferred to the sample preparation  
306   chamber at -160°C. After 5 min, the temperature was raised to -85°C, and the  
307   samples were etched for 20 min. After coating at -130°C, the samples were  
308   transferred to the SEM chamber and observed at -160°C and 20 KV.

309           The general cell morphology was studied by negative staining and observed  
310   under TEM. Bacteria were enriched in MMB for 1 day before adding a fixative  
311   solution (2.5% glutaraldehyde + 4% paraformaldehyde/0.1M PBS) at 37°C for 10  
312   min. To reduce the background signal of TEM observation, MMB was replaced  
313   first by PBS then by sterilized H<sub>2</sub>O twice, and the bacteria were mounted onto  
314   grow-discharge carbon-formvar grids. Bacteria were stained by 2%  
315   phosphotungstate for 1 s and, finally, the sample was rinsed with sterilized H<sub>2</sub>O  
316   twice and viewed under FEI G2 Tecnai Spirit Twin TEM at 80 KV. The images were  
317   then captured with a Gatan Orius CCD camera.

318   **Phylogenetic analysis of *Endozoicomonas* sp. zOTUs**

319 To phylogenetically place the dominant *Endozoicomonas* zOTUs identified  
320 and the 16S rRNA gene of *Ca. E. penghunesis* 4G, and to identify their closest  
321 neighbor within genus *Endozoicomonas* and its cultured isolates, representative  
322 16S rRNA sequences from type strains (12 total) and one outgroup *Halospina*  
323 *denitrificans* HGD were downloaded from the NCBI taxonomy database  
324 (<https://www.ncbi.nlm.nih.gov/taxonomy>). Sequences were aligned using the  
325 RNA homology search tool cmalign [53] from the infernal package, and the CM  
326 models for domain bacteria were acquired from the rfam database [54]. A  
327 maximum-likelihood phylogeny tree was built using the IQ-TREE web server [55]  
328 with 1000 bootstraps and best model selection enabled (best model: K2P+I+G4).  
329 The tree was finally visualized and edited in the laboratory-licensed version of  
330 iTOL v4 [56].

331

### 332 **Long- and short-read paired-end sequencing and genome assembly**

333 Long reads obtained from nanopore sequencing were first quality checked  
334 with nanoqc [57] and only high-quality paired-end reads were used for genome  
335 assembly using metaFlye [58] with default settings. Illumina reads (2x 300) were  
336 first quality checked with FastQC  
337 (<https://www.bioinformatics.babraham.ac.uk/projects/fastqc/>), then the

338 adapters were removed and the reads trimmed with AdapterRemoval v2 [59].  
339 High quality (phred >30) and trimmed paired-end reads were used to polish the  
340 crude nanopore assembly with four rounds of pilon [60] with default settings.

### 341 **Genome annotation**

342 The assembled genome was first checked for completeness, contamination,  
343 and heterogeneity using CheckM [61]. The *E. acroporae* Acr-14<sup>T</sup> genome [62] was  
344 assembled previously in our laboratory. Protein predictions in two  
345 *Endozoicomonas* sp. was performed with Prodigal in Prokka [63] with default  
346 settings to keep gene calls preserved for further functional categories analysis. A  
347 Rapid Annotation using subsystem technology (RAST) server [64] was used to  
348 obtain higher-order subsystem level features. The “reconstruct pathway”  
349 approach in blastKOALA v2.2 [65] was used to obtain KEGG Ontology (KO) terms  
350 and in-depth annotation of the proteome. CRISPRcasFinder [66] was used to  
351 access the CRISPR-spacer. Eukaryote-like proteins (ELPs) were searched from a  
352 Batch Web-CD search against the CDD database [67], with minimum e-value 1e-5  
353 and maximum hit number set to 50. Circular genomic map of *Ca. E. penghunesis*  
354 4G was visualized by CGView Server beta [68].

### 355 **Data availability**

356 All sequencing data generated in this manuscript was submitted under the  
357 BioProject: PRJNA758232 and the *Ca. E. penghunesis* genome was made available  
358 under Accession ID: SAMN21016876

## 359 **Results**

### 360 **Sampling and sequencing overview**

361 We collected a total of 110 coral and 12 seawater samples from the  
362 experiment, of which 10 coral fragments were removed (all from the Inner Bay)  
363 during the experiment (marked with an 'X' in Figure 2A–B) as they appeared to be  
364 dead. These dead samples were only used to help contrast with the microbial  
365 community compositions of healthy corals and were later removed before  
366 downstream analyses, including  $\alpha$  and  $\beta$  diversity analyses. At the end of the  
367 experiment, we had 100 coral and 12 seawater samples. A total of 2,015,935 high-  
368 quality reads (average 16,524 reads per sample) were obtained after removing  
369 chimeras and poor-quality reads from the 110 coral and 12 seawater samples.  
370 These reads were denoised into 2064 zOTUs. Healthy corals (n=100) had  
371 1,815,002 reads (range: 6092–67598), 1966 zOTUs and seawater (n=12) had  
372 149,638 reads (range: 6897–19777) and 1521 zOTUs.

373

374

375 **Coral and seawater microbiomes differ in bacterial diversity and compositions**

376       The coral and seawater samples were significantly different in bacterial  
377 diversity and evenness, measured through zOTU richness (Figure S1A), Shannon  
378 (Figure S1B) and Chao1 (Figure S1C) diversities, and Inverse Simpson evenness  
379 (Figure S1D). The seawater samples had more than twice the zOTU richness and  
380 Shannon and Chao1 diversities compared to the coral samples. August samples  
381 showed an unusual alpha diversity pattern, particularly in seawater samples; this  
382 could be because the samples were collected during heavy rainfall ( $\pm 3$  days). We  
383 observed an increase in richness and Chao1 between O $\rightarrow$ I and OC samples, but  
384 no apparent differences were observed between I $\rightarrow$ O and IC samples. In terms of  
385 corals at different locations, there was no significant difference in calculated  
386 alpha diversity measures between control and transplant samples from the Inner  
387 and Outer Bay (Figure S1 A–D).

388       *Proteobacteria* (specifically Class *Alphaproteobacteria*) and *Bacteroidetes*  
389 (Class: *Flavobacteriia*) were the dominant phyla in seawater samples across all  
390 time points, followed by *Cyanobacteria*, which was particularly abundant in Inner  
391 Bay samples. There was heavy rainfall during the week in August that samples  
392 were collected, and we noticed a higher abundance of *Marinimicrobia* (Class:  
393 *Marnimicrobia* SAR406 clade), *Planctomycetes*, and *Verrucomicrobia* in those

394 samples, which might explain the different bacterial diversity and evenness  
395 results obtained that month. On the contrary, coral samples were dominated by  
396 *Proteobacteria* (specifically Class: *Gammaproteobacteria*), *Chlamydiae*, and  
397 *Tenericutes* (Class: *Mollicutes*). Dead coral samples had a similar bacterial  
398 community composition as seawater samples (Figure 2A, Figure S2).

### 399 **Changes in the coral microbial community throughout the reciprocal transplant**

400 *Proteobacteria* was the dominant phylum across all sample groups (control:  
401 IC and OC; transplant: I→O and O→I) from the two locations throughout the  
402 experiment. We observed shifts in the microbial community of control samples (IC  
403 and OC) from April–August and December. The relative abundance of *Chlamydiae*  
404 (Family: *Simkaniaceae*), the second abundant phylum in the outer Bay (OC) with  
405 all zOTUs (10 in count) belonging to “Unclassified Simkaniaceae,” decreased  
406 from April to August before increasing slightly in December. *Tenericutes*  
407 (specifically *Mollicutes*), the second dominant phylum in the Inner Bay control  
408 samples (IC), increased in abundance over time, peaking in December. One zOTU  
409 annotated as “Unclassified Entomoplasmatales” had the highest abundance  
410 among different members of *Tenericutes*, including zOTUs belonging to  
411 *Acholeplasma*, *Mycoplasma*, and *Candidatus* (Bacilloplasma), and *Candidatus*  
412 (Hepatoplasma). In July, we observed a sudden spike in *Verrucomicrobia*

413 abundance in two samples from IC, but soon after in August the community  
414 composition became similar to that in June. We also observed patterns of  
415 community dynamics in *Chlamydiae* and *Tenericutes* in cross-transplant samples  
416 (I→O and O→I) over the sampling period. *Chlamydiae* became the most  
417 dominant group in O→I (May) samples, but its abundance decreased sharply  
418 thereafter, whereas in I→O samples, *Chlamydiae* and *Tenericutes* both remained  
419 stable, with *Chlamydiae* being dominant in May and June, and *Tenericutes* being  
420 dominant in July and August (Figure 2A, Figure S2).

421 At the genus taxonomic rank, *Endozoicomonas* species were the most  
422 dominant. Forty-eight zOTUs (out of 2,064) were taxonomically classified as  
423 *Endozoicomonas*. These 48 zOTUs accounted for an average of ~54% relative  
424 abundance in corals fragments and 0% in sea-water samples. Of these 48 zOTUs,  
425 13 contributed ~90% of the total *Endozoicomonas* abundance. Interestingly, IC  
426 and OC samples harbored different dominant *Endozoicomonas* zOTUs, with  
427 zOTU1 and zOTU2 being dominant in OC and zOTU7 and zOTU9 in IC. Across the  
428 sampling time, we also observed shifts in the dominant *Endozoicomonas*  
429 phylotypes, zOTU2 was dominant from April to June, whereas zOTU1 became  
430 dominant in July–December OC samples. In IC samples, zOTU7 was dominant  
431 from April to May, but after that its relative abundance declined (Figure 2B). It is



432 also worth noting that a significant decline in the *Endozoicomonas* abundance was  
433 observed in IC samples in July, August, and December (Figure 2B), suggestive of a  
434 locational dependence.

435 In cross-transplant samples, the *Endozoicomonas* phylotypes from OC  
436 remained resistant to change when transplanted in the Inner Bay (O→I), with  
437 zOTU2 being dominant across all sampling times. For I→O transplanted samples,  
438 however, instead of *Endozoicomonas* phylotypes from IC, we observed that  
439 zOTU1—another dominant *Endozoicomonas* phylotype in OC samples—was  
440 dominant (Figure 2B), suggesting that the phylotypes had different robustnesses  
441 under different environmental scale disturbances.

#### 442 **Location-dependent robustness in the coral microbiome**

443 The dispersion of homogeneity analysis identified that the bacterial  
444 community in corals with the Inner Bay as the final location (IC and O→I) were  
445 significantly different from each other (ANOVA,  $F=9.23$ ,  $p < 0.001$ ), whereas  
446 samples whose final destination was the Outer Bay (OC and I→O) had no  
447 significant difference (ANOVA,  $F=1.98$ ,  $p > 0.05$ ), indicating that the microbiome  
448 had location specificity. Therefore, samples whose final destinations were the  
449 Inner Bay and Outer Bay were analyzed independently to test for differences in

450 community composition between the control and transplant groups. Ordination  
451 analysis using nMDS, followed by PERMANOVA identified the significant influence  
452 of coral sample, sampling month, and their combined effect (interaction term)  
453 Figure 3A). Ellipses with a 95% confidence interval suggested that samples for  
454 which the Outer Bay was their final location (OC and I→O) were more similar to  
455 each other compared to samples for which the Inner Bay was their final location  
456 (IC and O→I). These findings support locational variability and differential  
457 robustness in the coral microbiome (Figure 3A–B). Transplanted samples (O→I)  
458 clustered tightly compared to IC samples, indicating less variability after  
459 transplantation in the transplant samples. However, highly overlapping ellipses  
460 were observed for OC and I→O samples, suggesting a highly similar microbial  
461 community in the control (OC) and transplanted samples from the Inner Bay  
462 (I→O) (Figure 3A–B).

### 463 **Differentially abundant microbiome dominated by *Endozoicomonas*-related** 464 **phylotypes**

465 LEfSe analysis identified differentially abundant zOTUs of different taxa  
466 across all the sampling groups: nine zOTUs were differentially abundant in OC  
467 samples, 13 in I→O samples, and 16 in IC and O→I samples (Figure 3C–D).

468 Interestingly, all the differentially abundant zOTUs in the OC samples belonged to  
469 *Endozoicomonas*, but zOTUs belonging to diverse taxa—including the BD1-7 clade  
470 (*Gammaproteobacteria*), *Entomoplasmatales* (Phylum: *Tenericutes*; Class:  
471 *Mollicutes*), and *Alteromonadaceae* (Class: *Gammaproteobacteria*)—were  
472 differentially abundant in I→O samples (Figure 3C). Similarly, out of the 16 zOTUs  
473 that were differentially abundant in O→I samples, 13 were *Endozoicomonas*; IC  
474 samples also had zOTUs belonging to diverse taxa that were differentially  
475 abundant, including Surface 1\_ge (Class: *Alphaproteobacteria*), *Synechococcus*  
476 (Class: *Cyanobacteria*), and others (Figure 3D).

#### 477 **Phylogenetic analysis of dominant *Endozoicomonas* zOTUs and a novel cultured** 478 **species**

479 The high abundance of *Endozoicomonas*-related phylotypes in the coral  
480 samples and their differential robustness after transplantation a) motivated us to  
481 determine their phylogenetic position and b) provided an opportunity to isolate  
482 and culture these phylotypes. A phylogenetic tree based on 16S rRNA gene  
483 sequences and the percentage identity (% identity) match between these  
484 sequences confirmed that zOTU1 and zOTU2 were 99.02 and 98.05% identical  
485 (16S rRNA V6-V8 region), respectively, to *Endozoicomonas acroporae* Acr-14<sup>T</sup>

486 (Figure 4A). They also formed a distinct clade with zOTU10, zOTU13, zOTU15, and  
487 zOTU18 (Figure 4A). These zOTUs (zOTU 10, 13,15, and 18) were also >97%  
488 identical to *E. acroporae* Acr-14<sup>T</sup> 16S rRNA gene (Figure S3A). However, zOTU7,  
489 zOTU9, zOTU16, and zOTU17 formed a separate clade away from any cultured  
490 *Endozoicomonas* species (Figure 4A). zOTU7 was 100% identical to a newly  
491 isolated and cultured species (*Ca. E. penghunesis* 4G) described in this study (see  
492 sections below) and zOTU9 had 98.70% identity (16S rRNA gene V6-V8 region)  
493 with *Ca. E. penghunesis* 4G (Figure 4A). zOTU17 and zOTU16 were also >97%  
494 identical to *Ca. E. penghunesis* 4G 16S rRNA gene (Figure S3B). A genomic analysis  
495 of *Ca. E. penghunesis* 4G identified seven copies of 16S rRNA (see the section  
496 below) based on percentage similarity; 16S rRNA gene copy (1) (Figure S3C) was  
497 used as the representative for the phylogenetic tree in Figure 4A. We also  
498 performed phylogenetic analysis for all copies of 16S rRNA present in *Ca. E.*  
499 *penghunesis* and *E. acroporae* Acr-14<sup>T</sup> (Figure S3 D).

#### 500 **Description of *Ca. Endozoicomonas penghunesis* 4G**

501 *Ca. E. penghunesis* 4G is a gram-negative, facultatively anaerobic, and  
502 slightly motile bacterium that forms beige-colored colonies (size=2.14x0.66 μm)  
503 and is slightly susceptible to the antibiotics streptomycin and ampicillin. No

504 catalase enzymatic activity was reported for this bacterium, but the bacterial  
505 culture was trypsin and oxidase-positive (Table S2). This new bacterial species  
506 tolerates the widest temperature (15–35°C) and salinity (5–30 PSU) ranges of the  
507 characterized *Endozoicomonas* species (Table S3). The pH range for growth was  
508 pH 6.0–10.0, with optimal growth observed at a slightly alkaline pH (pH 8.0). SEM  
509 and TEM analyses identified rod-shaped cells (Figure S4C) surrounded by a  
510 possible mucus lining (Figure S4A) and with structures that appeared to be  
511 granules or vacuoles in the cell (Figure S4B). A 16S rRNA gene sequence blast  
512 search identified the closest cultured relative to be *Endozoicomonas montiporae*  
513 CL-33 (Accession ID: CP013251) with 96.17% identity; based on a species identity  
514 cutoff of 97%, this suggests that the bacterium is a novel *Endozoicomonas*  
515 species.

#### 516 **Genome assembly features of *Ca. E. penghunesis* 4G**

517 The genome of *Ca. E. penghunesis* 4G was first assembled using Nanopore  
518 reads and later polished with quality filtered Illumina reads, resulting in a single  
519 contig of 6,004,453 bp and N50 (6,004,453). Genome completeness,  
520 contamination, and strain heterogeneity were estimated to be 97.52, 0.98, and  
521 0%, respectively. Out of 573 single-copy marker genes (c\_Gammaproteobacteria)

522 from the checkM database [61], 493 genes were present only once, five single-  
523 copy markers were duplicated, and nine were missing. Based on the criteria of  
524 “minimum information for single amplified and metagenome-assembled genome  
525 of bacteria” [69], our genome can be considered “finished.” The GC content of the  
526 genome was 49.1%, which is similar to that of other *Endozoicomonas* species.

#### 527 **Genomic features of *Ca. E. penghunesis* 4G**

528 A total of 5,019 genes and 4,913 CDS were predicted from the genome. We  
529 annotated seven copies of 16S, nine of 23S, eight of 5S rRNA genes, and 80 tRNAs.  
530 A sequence similarity analysis of 16S rRNA gene copies revealed that all copies  
531 were at least 98.76% identical, with four copies >99.28% identical and two 100%  
532 identical to each other (Figure S3C). Copy-1 of the 16S rRNA gene was used as a  
533 representative sequence to classify the closest relative of dominant  
534 *Endozoicomonas* zOTUs identified in this study (Figure 4A). There were no CRISPR  
535 elements and only one prophage was identified in the genome. Out of the 5,019  
536 genes predicted, more than 50% (2,721) were annotated to be hypothetical.  
537 Since, *Endozoicomonas* species have been exclusively isolated from their marine  
538 eukaryotic hosts, including *Ca. E. penghunesis* 4G, we searched for ELPs and  
539 identified 43 WD40 domain proteins (WD40), four Ankyrin repeat proteins (ARPs),

540 and 12 Tetratricopeptide repeat proteins (TRPs). Almost all the WD40 domain-  
541 containing proteins were arranged consecutively (Figure 4B) and flanked by  
542 transposes. Most (27 out of 41) of the WD40 domain proteins were annotated as  
543 TolB protein from the Tol-Pal system, which is important for maintaining cellular  
544 integrity, and others (14) were classified as hypothetical proteins. A wide array of  
545 secretory proteins were also annotated with 248 Type III secretion system  
546 effectors (T3SS), 50 Type IV secretion system effectors (T4SS), and 10 Type VI  
547 secretion system effectors (T6SS) annotated from the proteome.

#### 548 **Metabolic repertoire of *Ca. E. penghunesis* 4G**

549 RAST classified only 36% (1,756) of the total genes into subsystems.  
550 Subsystems a) Carbohydrates and b) Cofactors, Vitamins, Prosthetic groups, and  
551 Pigments had the highest number of annotated genes—270 and 238, respectively  
552 (Figure S5). In the stress response subsystem, 108 genes were annotated, most of  
553 which were related to oxidative stress response (46 genes), followed by heat  
554 shock response (18) and detoxification response (16). Interestingly, within the  
555 osmotic stress response, we identified genes for betaine transport via ATP-  
556 binding cassette transporter, BetS (high-affinity choline uptake protein BetS),  
557 arranged in tandem with an L-proline glycine betaine ABC transport system

558 permease (ProV and OusW) (Figure 4B). Multiple copies of superoxide dismutase,  
559 alkyl hydroperoxide reductase, and methionine sulfoxide reductase genes were  
560 also identified in the genome.

561 *Ca. E. penghunesis* 4G had genes encoding essential amino acids and pathways  
562 including glycolysis and tricarboxylic acid cycle; genes for converting nitrate to  
563 nitrite (NapAB, KO: K02567) and ammonia to L-glutamate were identified, but  
564 none related to the conversion of nitrite to ammonia. Assimilatory and  
565 dissimilatory sulfate reduction and oxidation pathways were also completely  
566 absent. Furthermore, no genes related to the uptake of extracellular taurine or its  
567 metabolism to sulfite were identified. Interestingly, siroheme biosynthesis and  
568 siroheme-dependent anaerobic sulfite reduction operons were present in *Ca. E.*  
569 *penghunesis* 4G (Figure 4B). We also identified genes arranged in an operon-like  
570 manner for anaerobic glycerol degradation.

## 571 **Comparing *E. acroporae* and *Ca. E. penghunesis* physiological and genomic** 572 **features**

573 *Endozoicomonas* phylotypes belonging to *E. acroporae* and *Ca. E. penghunesis* 4G  
574 were dominant in colonies of coral *Acropora muricata* in the Outer and Inner Bay,  
575 respectively (figure 2B, 4A). This selective dominance could be attributed to



576 multiple factors, including bacterial physiological and genetic repertoire.  
577 Therefore, we compared the two species—*Ca. E. penghunesis* had a wider growth  
578 temperature range compared to *E. acroporae* and was slightly motile. *E.*  
579 *acroporae*, on the other hand, was non-motile (Table S2) and had a wider salinity  
580 and growth pH range (Table S3). A wider growth temperature range of *Ca. E.*  
581 *penghunesis* and its dominance in the Inner Bay aligns with the high variation of  
582 temperature fluctuations (from summer to winter) observed in the calmer waters  
583 of the Inner Bay. Comparing the metabolic repertoire of the two species, we  
584 found that genes for dimethylsulfoniopropionate (DMSP) metabolism and  
585 dimethylsulfoxide (DMSO) reduction were absent from *Ca. E. penghunesis*, but *E.*  
586 *acroporae* had a complete operon for DMSP metabolism as reported in our  
587 previous study [33] as well as genes for DMSO reduction. Lack of a potent  
588 oxidative stress response gene repertoire potential could be the reason for the  
589 loss of abundance of *Ca. E. penghunesis* in the control (IC) and transplant samples  
590 (I→O) in summer (June-August). Furthermore, the robustness of *E. acroporae* in  
591 the control (OC) and transplant samples (O→I) throughout the year could be due  
592 to the species' ability to remove oxidative stress (which increased in summer)  
593 more efficiently via DMSP metabolism and the presence of catalase activity.

#### 594 **Coral mortality in the Inner Bay**

595           We observed coral mortality exclusively in the Inner Bay for both IC and  
596 O→I samples (marked as 'X', Figure 2A-B). Grazing by *Drupella cornus* was also  
597 observed in the samples from the Inner Bay during the sampling in May, and  
598 continued until December (Figure S6).

## 599 **Discussion**

600           This study aimed to test the differential adaptation capability of  
601 *Endozoicomonas*, one of the most dominant bacterial groups in the coral  
602 microbiome. We analyzed the microbiome dynamics of the common Indo-Pacific  
603 coral *A. muricata* over 9 months following a reciprocal transplant experiment at  
604 the finest resolution of zOTUs. We identified that different *Endozoicomonas*  
605 phylotypes in the coral *A. muricata* coral colonies belonging to two dominant  
606 species, including a novel species, have differential adaptation capabilities, with  
607 one species more resilient to change than the other. Our results shed light on an  
608 often-neglected factor when determining variations in community composition:  
609 bacterial species/strains adapt differently when coral hosts are subjected to biotic  
610 and abiotic stressors. Furthermore, we also isolated, cultured, and sequenced a  
611 single chromosome-level genome of one of the dominant phylotypes belonging to  
612 a novel *Endozoicomonas* species, *Ca. Endozoicomonas penghunesis* 4G, to

613 ascertain the ecological and functional role of this bacterium and add to the  
614 growing knowledge and genome datasets of this key microbe in coral reefs.

615 *Acropora muricata* microbiome was dominated by members of class  
616 *Gammaproteobacteria* (Phylum: *Proteobacteria*) (Silva v132 grouped  
617 *Gammaproteobacteria* into *Betaproteobacteria*), particularly by *Endozoicomonas*-  
618 related phlotypes (Figure 2A–B; Figure S2). Members of genus *Endozoicomonas*  
619 are often found to be the dominant group in the microbiome of several coral  
620 species—e.g., members of *Acropora*, *Pocillopora*, and *Stylophora* [3, 24, 30, 70]—  
621 and have been proposed to play a significant role in coral health and protection  
622 [2, 71] and coral sulfur cycling [33, 72]. Another dominant bacterial group,  
623 *Simkaniaceae* (Phylum: *Chlamydiae*, Class: *Chlamydiae*), was described as an  
624 obligate intracellular bacterium, but its function has remained enigmatic [70, 73].  
625 Like *Endozoicomonas*, *Simkaniaceae*-related phlotypes were also recently found  
626 to be abundant in healthy corals from the reefs in Florida, but their abundance  
627 decreased in corals suffering from stony coral tissue loss disease [74]. Members of  
628 class *Mollicutes*—particularly zOTUs related to *Entomoplasmales* and  
629 *Mycoplasmales*—are suggested to be mutualistic or commensal bacteria in  
630 temperate and deep-sea gorgonians and cold-water Scleractinia corals, but their  
631 specific function remains unknown [75, 76]. Overall, the microbial community

632 composition in the coral colonies of the control group remained stable  
633 throughout the experiment timeline, with only transient differences observed  
634 between them across sampling time (Fig 2A and 2B).

635         Spatial and temporal fluctuations in the microbiome were observed  
636 throughout the experiment, community abundance (Figure 2A) and ordination  
637 analysis showed that community structure varies across temporal and spatial  
638 scales (Figure 3A). Varying degrees of overlap between the samples from the  
639 same location suggest that the microbes show different scales of variability, and  
640 that microbial structure is a function of the local environment. Previous studies  
641 have also shown that the microbiome varies spatially due to differences in the  
642 sites' local environments [18, 77]. Ocean currents are believed to have a  
643 homogenizing effect on the microbial communities, and the same coral species  
644 separated by hundreds to thousands of kilometers have been found to have  
645 similar microbiome compositions [1, 4]. Our results were surprising in this regard,  
646 as a high site-to-site variation was observed at a relatively small scale. A potential  
647 reason for this variation could be high abiotic and anthropogenic pollution in the  
648 Inner Bay compared to the Outer bay; similar results were obtained in an earlier  
649 study by Ziegler et al [27].

650

651 Utilizing the zOTU approach for metabarcoding data analysis and focusing  
652 on the dominant bacterial genus, we identified that colonies of *A. muricata* from  
653 the Inner and Outer Bay were not dominated by a single *Endozoicomonas*  
654 phylotype, but had several differentially abundant phylotypes associated with  
655 them (Figure 2B). These results are similar to the multiple phylotypes that were  
656 reported to be dominant in colonies of the same coral species as identified earlier  
657 [70]. However, the dominant *Endozoicomonas* phylotypes identified in our study  
658 were different in coral colonies from the two locations, with Inner Bay colonies  
659 harboring a novel species *Ca. E. penghunesis* and Outer Bay colonies harboring *E.*  
660 *acroporae*-related phylotypes (Figure 4A). This result was intriguing, as corals of  
661 the *Acropora* genus are known to have a strong influence on their microbial  
662 community composition [18]. Another observation that arises from these results  
663 is how the single-nucleotide variation approach utilized to obtain ASVs or zOTUs  
664 can potentially lead to increased diversity (richness) estimates, which rely on ASV  
665 or zOTU counts, especially with bacterial groups known to have more than one  
666 copy of non-identical 16S rRNA genes in their genome. In our study this is true in  
667 the case of the genus *Endozoicomonas*: members of this genus are known to  
668 harbor more than one copy of 16S rRNA, complete genomes of *Endozoicomonas*  
669 *montiporae* CL-33<sup>T</sup> have seven copies [52], similar to *Ca. E. penghunesis*, that are

670 not all identical (Figure S3); hence, we used a phylogenetic approach to assign the  
671 taxonomy to these *Endozoicomonas* phylotypes.

672

673 Members of the coral holobiont potentially engage in complex interactions  
674 to maintain the health and fitness of the coral host, and external stressors could  
675 disturb these interactions by influencing the composition of the holobiont. To  
676 overcome the influence of the external stressors, a genomic adaptation of the  
677 holobiont members (in our case, bacteria) could play an important role in host  
678 survival. Since, a bacterium is likely to be not as well adapted to a new niche as  
679 resident strains, unless it has the genetic capability to mitigate the new stressors  
680 [78, 79]. During our reciprocal transplant experiment, we observed that *E.*  
681 *acroporae*-related zOTUs remained dominant in the control (OC) and the  
682 transplanted samples (O→I), with only change in the dominant zOTU from zOTU1  
683 to zOTU2, whereas, those related to *Ca. E. penghunesis* 4G were only dominant in  
684 April and May months in the control samples of the Inner Bay (IC) (Figure 2B).

685 There are a few possible reasons for this observation. One is that *E.*  
686 *acroporae* may be more resilient and better adapted to diverse conditions  
687 encountered in the Inner and the Outer Bay compared to *Ca. E. penghunesis* 4G.  
688 However, further investigation is required to say this with greater confidence. In

689 addition, variation in the abundance of the different *Endozoicomonas* phylotypes  
690 is potentially analogous to the abundance of genotypes of different  
691 endosymbiotic algae *Symbiodinium*, often found in coral colonies [80]. Several  
692 coral species can perform “symbiont shuffling” to select for the more  
693 thermotolerant genotype of endosymbiotic algae in response to thermal stress  
694 [81–83]. We observed microbial shuffling in *Endozoicomonas* phylotypes to a  
695 certain degree in our transplant samples, where zOTU2 became dominant in O→I  
696 samples and zOTU1 became dominant in I→O sample, although the genus’  
697 abundance was very low in IC samples, which were dominated by zOTU7 and  
698 zOTU9 (Figure 2B). However, the selective advantages or potential benefits of  
699 shuffling microbiome members are unclear and require further explorations.

700 Underpinning the functional and ecological role of coral-associated  
701 microbes in reefs has become critical to developing an intervention for coral reef  
702 protection, such as developing a coral probiotic [2, 84]. These interventions  
703 require in-depth information about members of the coral holobiont. In the  
704 current study, we isolated, cultured, and sequenced the complete genome of a  
705 dominant *Endozoicomonas* phylotype identified in the metabarcoding data  
706 analysis. Phylogenetic analysis identified that the dominant zOTUs (zOTU1,  
707 zOTU2, zOTU10, zOTU11, zOTU13, and zOTU18) from the Outer Bay were closer

708 to a previously characterized species *E. acroporae* [85], whose genome was  
709 sequenced earlier [33, 62].

710 On the other hand, the Inner Bay-dominant zOTUs (zOTU7, zOTU9, zOTU16,  
711 and zOTU17) were closest to the novel species *Ca. E. penghunesis* 4G isolated and  
712 characterized in this study. Genomic analysis of *Ca. E. penghunesis* revealed  
713 features similar to other *Endozoicomonas* species—i.e., large genome size (~6.00  
714 Mb), many coding genes (4,913), and complete pathways for essential amino  
715 acids—suggesting a free-living life stage, yet *Endozoicomonas* have been called an  
716 “obligate” endosymbiont of corals [71]. This assertion of an “obligate”  
717 endosymbiont stems from the almost negligible abundance of *Endozoicomonas* in  
718 the coral-ecosphere [86] and very low abundance in early life stages of coral [80,  
719 87]. Furthermore, a comparative genomics study identified that *Endozoicomonas*  
720 species are capable of differential functional specificity, and different genotypes  
721 may play disparate metabolic roles in their hosts [34]. This is true for sulfur  
722 metabolism, where *E. acroporae* is the only known *Endozoicomonas* species  
723 capable of metabolizing dimethylsulfoniopropionate (DMSP) to dimethylsulfide  
724 (DMS) [33], genes for DMSP metabolism operon were not present in the genome  
725 of *Ca. E. penghunesis*. However, transporters (three copies) for glycine-betaine,  
726 another osmolyte, were identified in the genome of *Ca. E. penghunesis*. Other



727 *Endozoicomonas* species have also been identified to have the ability to scavenge  
728 glycine-betaine through transporters [88], potentially to alleviate oxidative stress.  
729 Identification of putative siroheme-dependent anaerobic sulfite reduction operon  
730 was interesting as this process facilitates growth under anaerobic conditions (B<sub>12</sub>-  
731 dependent anaerobic growth) by oxidizing 1,2-propanediol with tetrathionate as  
732 an electron acceptor [89]. Physiological tests also showed that *Ca. E. penghunesis*  
733 is a facultative anaerobe; however, more functional evidence is required to  
734 confirm this outcome and the advantage (if any) it provides the bacterium and  
735 coral host that maintains it.

736         We observed coral mortality during our experiment exclusively in the Inner  
737 Bay, the corallivorous snail *Drupella cornus*, which exclusively feeds on living  
738 tissue, grazed there (Figure S6). These gastropods occur throughout the shallow  
739 waters of the Indo-Pacific region [90]. Outbreaks of this corallivorous marine  
740 gastropod have been recorded in different parts of the Gulf of Eilat, Israel [91]  
741 and the Great Barrier Reef, Australia [92]. Coral feeding gastropods of *Drupella* sp.  
742 show a strong preference for preying on *Acroporids* [93] and are known to be  
743 efficient vectors for brown band disease in corals [92, 94]. Though no *Drupella* sp.  
744 outbreaks to date have been recorded in Taiwan's coral reefs and no visible signs  
745 of brown band disease were observed in our study, it is important to keep

746 monitoring the corals in the Penghu Archipelago for signs of climate change and  
747 disease outbreaks in the near future.

## 748 **Conclusion**

749 A variety of factors, many of which are external, are known to influence the coral  
750 microbiome composition and its dynamics. However, an important internal factor,  
751 the adaptation capability of microbiome members, which governs the survival of  
752 a bacterium in a niche, has been overlooked. Using a combination of  
753 metabarcoding, genomic, and comparative genomic approaches, we showed that  
754 members of the dominant bacterial group *Endozoicomonas* are capable of  
755 sustaining and proliferating in a new niche following a reciprocal transplant  
756 experiment. Our ability to isolate and culture one of the dominant bacterial  
757 species, *Ca. Endozoicomonas penghunesis* 4G, builds on our knowledge of these  
758 important bacterial groups in the coral holobiont. Furthermore, we address  
759 critical aspects of using zOTUs/ASVs to estimate bacterial richness using  
760 metabarcoding data, which can result in often falsely inflated diversity estimates,  
761 especially in the case of microbes harboring more than one copy of non-identical  
762 16S rRNA gene, e.g. *Endozoicomonas*. In summary, we conclude that different  
763 members of the coral holobiont belonging to the same bacterial group can have  
764 differential adaptation capabilities, and this internal factor should also be

765 considered when devising interventions to protect coral reefs, like developing a  
766 coral probiotic.

## 767 **Acknowledgement**

768 This study was supported by funding to SLT from Academia Sinica and the  
769 Ministry of Science and Technology. We would like to thank Noah Last of Third  
770 Draft Editing for his English language editing.

## 771 772 **Conflict of Interest**

773 The authors declare no conflict of interest.

## 774 **References**

- 775 1. Rohwer F, Seguritan V, Azam F, Knowlton N. Diversity and distribution of  
776 coral-associated bacteria. *Marine Ecology Progress Series* . 2002. , **243**: 1–10
- 777 2. Peixoto RS, Rosado PM, Leite DC de A, Rosado AS, Bourne DG. Beneficial  
778 Microorganisms for Corals (BMC): Proposed Mechanisms for Coral Health and  
779 Resilience. *Front Microbiol* 2017; **8**: 341.
- 780 3. van Oppen MJH, Blackall LL. Coral microbiome dynamics, functions and design  
781 in a changing world. *Nat Rev Microbiol* 2019; **17**: 557–567.

- 782 4. Dinsdale EA, Pantos O, Smriga S, Edwards RA, Angly F, Wegley L, et al.  
783 Microbial ecology of four coral atolls in the Northern Line Islands. *PLoS One*  
784 2008; **3**: e1584.
- 785 5. Blackall LL, Wilson B, van Oppen MJH. Coral-the world's most diverse  
786 symbiotic ecosystem. *Mol Ecol* 2015; **24**: 5330–5347.
- 787 6. Bourne DG, Munn CB. Diversity of bacteria associated with the coral  
788 *Pocillopora damicornis* from the Great Barrier Reef. *Environ Microbiol* 2005; **7**:  
789 1162–1174.
- 790 7. Li J, Chen Q, Long L-J, Dong J-D, Yang J, Zhang S. Bacterial dynamics within the  
791 mucus, tissue and skeleton of the coral *Porites lutea* during different seasons.  
792 *Sci Rep* 2014; **4**: 1–8.
- 793 8. Glasl B, Herndl GJ, Frade PR. The microbiome of coral surface mucus has a key  
794 role in mediating holobiont health and survival upon disturbance. *ISME J*  
795 2016; **10**: 2280–2292.
- 796 9. Yang S-H, Tseng C-H, Huang C-R, Chen C-P, Tandon K, Lee STM, et al. Long-  
797 Term Survey Is Necessary to Reveal Various Shifts of Microbial Composition in  
798 Corals. *Front Microbiol* 2017; **8**: 1094.

- 799 10. Pollock FJ, McMinds R, Smith S, Bourne DG, Willis BL, Medina M, et al. Coral-  
800 associated bacteria demonstrate phyllosymbiosis and cophylogeny. *Nat*  
801 *Commun* 2018; **9**: 4921.
- 802 11. Agostini S, Suzuki Y, Higuchi T, Casareto BE, Yoshinaga K, Nakano Y, et al.  
803 Biological and chemical characteristics of the coral gastric cavity. *Coral Reefs*  
804 2012; **31**: 147–156.
- 805 12. Marcelino VR, van Oppen MJ, Verbruggen H. Highly structured prokaryote  
806 communities exist within the skeleton of coral colonies. *ISME J* 2018; **12**: 300–  
807 303.
- 808 13. Yang S-H, Tandon K, Lu C-Y, Wada N, Shih C-J, Hsiao SS-Y, et al. Metagenomic,  
809 phylogenetic, and functional characterization of predominant endolithic green  
810 sulfur bacteria in the coral *Isopora palifera*. *Microbiome* 2019; **7**: 3.
- 811 14. Ricci F, Fordyce A, Leggat W, Blackall LL, Ainsworth T, Verbruggen H. Multiple  
812 techniques point to oxygenic phototrophs dominating the *Isopora palifera*  
813 skeletal microbiome. *Coral Reefs* 2021; **40**: 275–282.
- 814 15. Littman RA, Willis BL, Pfeffer C, Bourne DG. Diversities of coral-associated  
815 bacteria differ with location, but not species, for three acroporid corals on the  
816 Great Barrier Reef. *FEMS Microbiol Ecol* 2009; **68**: 152–163.

- 817 16. Kvennefors ECE, Sampayo E, Ridgway T, Barnes AC, Hoegh-Guldberg O.  
818 Bacterial communities of two ubiquitous Great Barrier Reef corals reveals  
819 both site- and species-specificity of common bacterial associates. *PLoS One*  
820 2010; **5**: e10401.
- 821 17. Morrow KM, Moss AG, Chadwick NE, Liles MR. Bacterial associates of two  
822 Caribbean coral species reveal species-specific distribution and geographic  
823 variability. *Appl Environ Microbiol* 2012; **78**: 6438–6449.
- 824 18. Dunphy CM, Gouhier TC, Chu ND, Vollmer SV. Structure and stability of the  
825 coral microbiome in space and time. *Sci Rep* 2019; **9**: 6785.
- 826 19. Epstein HE, Smith HA, Cantin NE, Mocellin VJL, Torda G, van Oppen MJH.  
827 Temporal Variation in the Microbiome of *Acropora* Coral Species Does Not  
828 Reflect Seasonality. *Front Microbiol* 2019; **10**: 1775.
- 829 20. Bourne D, Iida Y, Uthicke S, Smith-Keune C. Changes in coral-associated  
830 microbial communities during a bleaching event. *ISME J* 2008; **2**: 350–363.
- 831 21. Zaneveld JR, Burkepile DE, Shantz AA, Pritchard CE, McMinds R, Payet JP, et al.  
832 Overfishing and nutrient pollution interact with temperature to disrupt coral  
833 reefs down to microbial scales. *Nat Commun* 2016; **7**: 11833.

- 834 22. Ziegler M, Seneca FO, Yum LK, Palumbi SR, Voolstra CR. Bacterial community  
835 dynamics are linked to patterns of coral heat tolerance. *Nat Commun* 2017; **8**:  
836 14213.
- 837 23. Shiu J-H, Keshavmurthy S, Chiang P-W, Chen H-J, Lou S-P, Tseng C-H, et al.  
838 Dynamics of coral-associated bacterial communities acclimated to  
839 temperature stress based on recent thermal history. *Sci Rep* 2017; **7**: 14933.
- 840 24. Maher RL, Schmeltzer ER, Meiling S, McMinds R, Ezzat L, Shantz AA, et al.  
841 Coral Microbiomes Demonstrate Flexibility and Resilience Through a  
842 Reduction in Community Diversity Following a Thermal Stress Event. *Frontiers*  
843 *in Ecology and Evolution* 2020; **8**: 356.
- 844 25. Wang L, Shantz AA, Payet JP, Sharpton TJ, Foster A, Burkepile DE, et al. Corals  
845 and their microbiomes are differentially affected by exposure to elevated  
846 nutrients and a natural thermal anomaly. *Front Mar Sci* 2018; **5**.
- 847 26. Gignoux-Wolfsohn SA, Aronson FM, Vollmer SV. Complex interactions  
848 between potentially pathogenic, opportunistic, and resident bacteria emerge  
849 during infection on a reef-building coral. *FEMS Microbiol Ecol* 2017; **93**.
- 850 27. Ziegler M, Roik A, Porter A, Zubier K, Mudarris MS, Ormond R, et al. Coral  
851 microbial community dynamics in response to anthropogenic impacts near a  
852 major city in the central Red Sea. *Mar Pollut Bull* 2016; **105**: 629–640.

- 853 28. Osman EO, Suggett DJ, Voolstra CR, Pettay DT, Clark DR, Pogoreutz C, et al.  
854 Coral microbiome composition along the northern Red Sea suggests high  
855 plasticity of bacterial and specificity of endosymbiotic dinoflagellate  
856 communities. *Microbiome* 2020; **8**: 8.
- 857 29. La Rivière M, Garrabou J, Bally M. Evidence for host specificity among  
858 dominant bacterial symbionts in temperate gorgonian corals. *Coral Reefs*  
859 2015; **34**: 1087–1098.
- 860 30. Ziegler M, Grupstra CGB, Barreto MM, Eaton M, BaOmar J, Zubier K, et al.  
861 Coral bacterial community structure responds to environmental change in a  
862 host-specific manner. *Nat Commun* 2019; **10**: 3092.
- 863 31. Glasl B, Smith CE, Bourne DG, Webster NS. Disentangling the effect of host-  
864 genotype and environment on the microbiome of the coral *Acropora tenuis*.  
865 *PeerJ* 2019; **7**: e6377.
- 866 32. Neave MJ, Rachmawati R, Xun L, Michell CT, Bourne DG, Apprill A, et al.  
867 Differential specificity between closely related corals and abundant  
868 Endozoicomonas endosymbionts across global scales. *ISME J* 2017; **11**: 186–  
869 200.



- 870 33. Tandon K, Lu C-Y, Chiang P-W, Wada N, Yang S-H, Chan Y-F, et al. Comparative  
871 genomics: Dominant coral-bacterium *Endozoicomonas acroporae* metabolizes  
872 dimethylsulfoniopropionate (DMSP). *ISME J* 2020; **14**: 1290–1303.
- 873 34. Neave MJ, Michell CT, Apprill A, Voolstra CR. *Endozoicomonas* genomes reveal  
874 functional adaptation and plasticity in bacterial strains symbiotically  
875 associated with diverse marine hosts. *Sci Rep* 2017; **7**: 1–12.
- 876 35. Ribas-Deulofeu L, Denis V, De Palmas S, Kuo C-Y, Hsieh HJ, Chen CA. Structure  
877 of Benthic Communities along the Taiwan Latitudinal Gradient. *PLoS One*  
878 2016; **11**: e0160601.
- 879 36. Hsieh HJ, Hsien Y-L, Jeng M-S, Tsai W-S, Su W-C, Chen CA. Tropical fishes killed  
880 by the cold. *Coral Reefs* 2008; **27**: 599–599.
- 881 37. Wilson K. Preparation of genomic DNA from bacteria. *Curr Protoc Mol Biol*  
882 2001; **Chapter 2**: Unit 2.4.
- 883 38. Chen C-P, Tseng C-H, Chen CA, Tang S-L. The dynamics of microbial  
884 partnerships in the coral *Isopora palifera*. *ISME J* 2011; **5**: 728–740.
- 885 39. Jorgensen SL, Hannisdal B, Lanzén A, Baumberger T, Flesland K, Fonseca R, et  
886 al. Correlating microbial community profiles with geochemical data in highly  
887 stratified sediments from the Arctic Mid-Ocean Ridge. *Proc Natl Acad Sci U S A*  
888 2012; **109**: E2846-55.

- 889 40. Edgar RC. UPARSE: highly accurate OTU sequences from microbial amplicon  
890 reads. *Nat Methods* 2013; **10**: 996–998.
- 891 41. Schloss PD, Westcott SL, Ryabin T, Hall JR, Hartmann M, Hollister EB, et al.  
892 Introducing mothur: open-source, platform-independent, community-  
893 supported software for describing and comparing microbial communities.  
894 *Appl Environ Microbiol* 2009; **75**: 7537–7541.
- 895 42. Edgar RC, Haas BJ, Clemente JC, Quince C, Knight R. UCHIME improves  
896 sensitivity and speed of chimera detection. *Bioinformatics* 2011; **27**: 2194–  
897 2200.
- 898 43. Edgar RC. UNOISE2: improved error-correction for Illumina 16S and ITS  
899 amplicon sequencing. *bioRxiv* . 2016. , 081257
- 900 44. Quast C, Pruesse E, Yilmaz P, Gerken J, Schweer T, Yarza P, et al. The SILVA  
901 ribosomal RNA gene database project: improved data processing and web-  
902 based tools. *Nucleic Acids Res* 2013; **41**: D590-6.
- 903 45. Yilmaz P, Parfrey LW, Yarza P, Gerken J, Pruesse E, Quast C, et al. The SILVA  
904 and “All-species Living Tree Project (LTP)” taxonomic frameworks. *Nucleic*  
905 *Acids Res* 2014; **42**: D643-8.
- 906 46. McMurdie PJ, Holmes S. phyloseq: an R package for reproducible interactive  
907 analysis and graphics of microbiome census data. *PLoS One* 2013; **8**: e61217.

- 908 47. Oksanen J, Kindt R, Legendre P, O’Hara B, Simpson GL, Solymos P, et al. vegan:  
909 Community Ecology Package. 2008.
- 910 48. Wickham H. ggplot2. *Wiley Interdiscip Rev Comput Stat* 2011; **3**: 180–185.
- 911 49. Kolde R. pheatmap: Pretty heatmaps. Github.
- 912 50. Cao Y. microbiomeMarker: R package for microbiome biomarker discovery.  
913 Github.
- 914 51. Shiu J-H, Ding J-Y, Tseng C-H, Lou S-P, Mezaki T, Wu Y-T, et al. A Newly  
915 Designed Primer Revealed High Phylogenetic Diversity of Endozoicomonas in  
916 Coral Reefs. *Microbes Environ* 2018; **33**: 172–185.
- 917 52. Ding J-Y, Shiu J-H, Chen W-M, Chiang Y-R, Tang S-L. Genomic Insight into the  
918 Host-Endosymbiont Relationship of Endozoicomonas montiporae CL-33(T)  
919 with its Coral Host. *Front Microbiol* 2016; **7**: 251.
- 920 53. Nawrocki EP, Eddy SR. Infernal 1.1: 100-fold faster RNA homology searches.  
921 *Bioinformatics* 2013; **29**: 2933–2935.
- 922 54. Kalvari I, Argasinska J, Quinones-Olvera N, Nawrocki EP, Rivas E, Eddy SR, et al.  
923 Rfam 13.0: shifting to a genome-centric resource for non-coding RNA families.  
924 *Nucleic Acids Res* 2018; **46**: D335–D342.

- 925 55. Trifinopoulos J, Nguyen L-T, von Haeseler A, Minh BQ. W-IQ-TREE: a fast  
926 online phylogenetic tool for maximum likelihood analysis. *Nucleic Acids Res*  
927 2016; **44**: W232-5.
- 928 56. Letunic I, Bork P. Interactive Tree Of Life (iTOL) v4: recent updates and new  
929 developments. *Nucleic Acids Res* 2019; **47**: W256–W259.
- 930 57. De Coster W, D’Hert S, Schultz DT, Cruts M, Van Broeckhoven C. NanoPack:  
931 visualizing and processing long-read sequencing data. *Bioinformatics* 2018;  
932 **34**: 2666–2669.
- 933 58. Kolmogorov M, Bickhart DM, Behsaz B, Gurevich A, Rayko M, Shin SB, et al.  
934 metaFlye: scalable long-read metagenome assembly using repeat graphs. *Nat*  
935 *Methods* 2020; **17**: 1103–1110.
- 936 59. Schubert M, Lindgreen S, Orlando L. AdapterRemoval v2: rapid adapter  
937 trimming, identification, and read merging. *BMC Res Notes* 2016; **9**: 88.
- 938 60. Walker BJ, Abeel T, Shea T, Priest M, Abouelliel A, Sakthikumar S, et al. Pilon:  
939 an integrated tool for comprehensive microbial variant detection and genome  
940 assembly improvement. *PLoS One* 2014; **9**: e112963.
- 941 61. Parks DH, Imelfort M, Skennerton CT, Hugenholtz P, Tyson GW. CheckM:  
942 assessing the quality of microbial genomes recovered from isolates, single  
943 cells, and metagenomes. *PeerJ* . 2015.

- 944 62. Tandon K, Chiang P-W, Chen W-M, Tang S-L. Draft Genome Sequence of  
945 *Endozoicomonas acroporae* Strain Acr-14T, Isolated from Acropora Coral.  
946 *Genome Announc* 2018; **6**.
- 947 63. Seemann T. Prokka: rapid prokaryotic genome annotation. *Bioinformatics*  
948 2014; **30**: 2068–2069.
- 949 64. Aziz RK, Bartels D, Best AA, DeJongh M, Disz T, Edwards RA, et al. The RAST  
950 Server: rapid annotations using subsystems technology. *BMC Genomics* 2008;  
951 **9**: 75.
- 952 65. Kanehisa M, Sato Y, Morishima K. BlastKOALA and GhostKOALA: KEGG tools  
953 for functional characterization of genome and metagenome sequences. *J Mol*  
954 *Biol* 2016; **428**: 726–731.
- 955 66. Couvin D, Bernheim A, Toffano-Nioche C, Touchon M, Michalik J, Néron B, et  
956 al. CRISPRCasFinder, an update of CRISRFinder, includes a portable version,  
957 enhanced performance and integrates search for Cas proteins. *Nucleic Acids*  
958 *Res* 2018; **46**: W246–W251.
- 959 67. Yang M, Derbyshire MK, Yamashita RA, Marchler-Bauer A. NCBI's Conserved  
960 Domain Database and tools for protein domain analysis. *Curr Protoc*  
961 *Bioinformatics* 2020; **69**: e90.

- 962 68. Grant JR, Stothard P. The CGView Server: a comparative genomics tool for  
963 circular genomes. *Nucleic Acids Res* 2008; **36**: W181-4.
- 964 69. Bowers RM, The Genome Standards Consortium, Kyrpides NC, Stepanauskas  
965 R, Harmon-Smith M, Doud D, et al. Minimum information about a single  
966 amplified genome (MISAG) and a metagenome-assembled genome (MIMAG)  
967 of bacteria and archaea. *Nat Biotechnol* 2017; **35**: 725–731.
- 968 70. Damjanovic K, Blackall LL, Peplow LM, van Oppen MJH. Assessment of  
969 bacterial community composition within and among *Acropora loripes* colonies  
970 in the wild and in captivity. *Coral Reefs* 2020; **39**: 1245–1255.
- 971 71. Neave MJ, Apprill A, Ferrier-Pagès C, Voolstra CR. Diversity and function of  
972 prevalent symbiotic marine bacteria in the genus *Endozoicomonas*. *Appl*  
973 *Microbiol Biotechnol* 2016; **100**: 8315–8324.
- 974 72. Raina J-B, Tapiolas D, Willis BL, Bourne DG. Coral-associated bacteria and their  
975 role in the biogeochemical cycling of sulfur. *Appl Environ Microbiol* 2009; **75**:  
976 3492–3501.
- 977 73. Collingro A, Tischler P, Weinmaier T, Penz T, Heinz E, Brunham RC, et al. Unity  
978 in variety--the pan-genome of the Chlamydiae. *Mol Biol Evol* 2011; **28**: 3253–  
979 3270.

- 980 74. Meyer JL, Castellanos-Gell J, Aeby GS, Häse CC, Ushijima B, Paul VJ. Microbial  
981 Community Shifts Associated With the Ongoing Stony Coral Tissue Loss  
982 Disease Outbreak on the Florida Reef Tract. *Front Microbiol* 2019; **10**: 2244.
- 983 75. Gray MA, Stone RP, McLaughlin MR, Kellogg CA. Microbial consortia of  
984 gorgonian corals from the Aleutian islands. *FEMS Microbiol Ecol* 2011; **76**:  
985 109–120.
- 986 76. van de Water JAJM, Melkonian R, Voolstra CR, Junca H, Beraud E, Allemand D,  
987 et al. Comparative Assessment of Mediterranean Gorgonian-Associated  
988 Microbial Communities Reveals Conserved Core and Locally Variant Bacteria.  
989 *Microb Ecol* 2017; **73**: 466–478.
- 990 77. Hernandez-Agreda A, Leggat W, Bongaerts P, Ainsworth TD. The Microbial  
991 Signature Provides Insight into the Mechanistic Basis of Coral Success across  
992 Reef Habitats. *MBio* 2016; **7**.
- 993 78. Hibbing ME, Fuqua C, Parsek MR, Peterson SB. Bacterial competition:  
994 surviving and thriving in the microbial jungle. *Nat Rev Microbiol* 2010; **8**: 15–  
995 25.
- 996 79. Sheppard SK, Guttman DS, Fitzgerald JR. Population genomics of bacterial host  
997 adaptation. *Nat Rev Genet* 2018; **19**: 549–565.

- 998 80. Quigley KM, Davies SW, Kenkel CD, Willis BL, Matz MV, Bay LK. Deep-  
999 sequencing method for quantifying background abundances of symbiodinium  
1000 types: exploring the rare symbiodinium biosphere in reef-building corals. *PLoS*  
1001 *One* 2014; **9**: e94297.
- 1002 81. Cunning R, Silverstein RN, Baker AC. Investigating the causes and  
1003 consequences of symbiont shuffling in a multi-partner reef coral symbiosis  
1004 under environmental change. *Proceedings of the Royal Society B: Biological*  
1005 *Sciences* 2015; **282**: 20141725.
- 1006 82. Bay LK, Doyle J, Logan M, Berkelmans R. Recovery from bleaching is mediated  
1007 by threshold densities of background thermo-tolerant symbiont types in a  
1008 reef-building coral. *R Soc Open Sci* 2016; **3**: 160322.
- 1009 83. Boulotte NM, Dalton SJ, Carroll AG, Harrison PL, Putnam HM, Peplow LM, et  
1010 al. Exploring the Symbiodinium rare biosphere provides evidence for symbiont  
1011 switching in reef-building corals. *ISME J* 2016; **10**: 2693–2701.
- 1012 84. Peixoto RS, Sweet M, Villela HDM, Cardoso P, Thomas T, Voolstra CR, et al.  
1013 Coral Probiotics: Premise, Promise, Prospects. *Annu Rev Anim Biosci* 2021; **9**:  
1014 265–288.



- 1015 85. Sheu S-Y, Lin K-R, Hsu M-Y, Sheu D-S, Tang S-L, Chen W-M. Endozoicomonas  
1016 acroporae sp. nov., isolated from Acropora coral. *Int J Syst Evol Microbiol*  
1017 2017; **67**: 3791–3797.
- 1018 86. Weber L, Gonzalez-Díaz P, Armenteros M, Apprill A. The coral ecosphere: A  
1019 unique coral reef habitat that fosters coral–microbial interactions. *Limnol*  
1020 *Oceanogr* 2019; **64**: 2373–2388.
- 1021 87. Lema KA, Bourne DG, Willis BL. Onset and establishment of diazotrophs and  
1022 other bacterial associates in the early life history stages of the coral *Acropora*  
1023 *millepora*. *Mol Ecol* 2014; **23**: 4682–4695.
- 1024 88. Ngugi DK, Ziegler M, Duarte CM, Voolstra CR. Genomic Blueprint of Glycine  
1025 Betaine Metabolism in Coral Metaorganisms and Their Contribution to Reef  
1026 Nitrogen Budgets. *iScience* 2020; **23**: 101120.
- 1027 89. Price-Carter M, Tingey J, Bobik TA, Roth JR. The alternative electron acceptor  
1028 tetrathionate supports B12-dependent anaerobic growth of *Salmonella*  
1029 *enterica* serovar typhimurium on ethanolamine or 1,2-propanediol. *J Bacteriol*  
1030 2001; **183**: 2463–2475.
- 1031 90. Claremont M, Reid DG, Williams ST. Evolution of corallivory in the gastropod  
1032 genus *Drupella*. *Coral Reefs* 2011; **30**: 977–990.

- 1033 91. Shafir S, Gur O, Rinkevich B. A *Drupella cornus* outbreak in the northern Gulf  
1034 of Eilat and changes in coral prey. *Coral Reefs* 2008; **27**: 379–379.
- 1035 92. Nicolet KJ, Hoogenboom MO, Gardiner NM, Pratchett MS, Willis BL. The  
1036 corallivorous invertebrate *Drupella* aids in transmission of brown band  
1037 disease on the Great Barrier Reef. *Coral Reefs* 2013; **32**: 585–595.
- 1038 93. Moerland MS, Scott CM, Hoeksema BW. Prey selection of corallivorous  
1039 muricids at Koh Tao (Gulf of Thailand) four years after a major coral bleaching  
1040 event. *Contrib Zool* 2016; **85**: 291–309.
- 1041 94. Nicolet KJ, Chong-Seng KM, Pratchett MS, Willis BL, Hoogenboom MO.  
1042 Predation scars may influence host susceptibility to pathogens: evaluating the  
1043 role of corallivores as vectors of coral disease. *Sci Rep* 2018; **8**: 5258.
- 1044

1045 **Figure legends**

1046 **Figure 1. Sampling location and reciprocal transplant experiment overview. A)**  
1047 Map of the Penghu Archipelago, Taiwan with two sampling sites: Inner Bay and  
1048 Outer Bay. **B)** Schematic representation of the reciprocal transplant experiment  
1049 setup with sample codes OC: Outer Bay Control; IC: Inner Bay Control, O→I: Outer  
1050 Bay colonies transplanted into the Inner Bay and I→O: Inner Bay colonies  
1051 transplanted into the Outer Bay.

1052 **Figure 2. Bacterial community composition overview. A)** Relative abundance-  
1053 based bacterial community composition at the phylum level across all sample sets  
1054 (IC, OC, I→O and O→I). **B)** Relative abundance of different *Endozoicomonas*  
1055 zOTUs across all sample sets. “X” in the figure denotes dead colonies.

1056 **Figure 3. Location-dependent bacterial community structure and differentially**  
1057 **abundant bacterial community.** Plots based on non-metric multidimensional  
1058 scaling (nMDS) of Bray-Curtis dissimilarity of bacterial community composition at  
1059 the zOTUs level associated with different locations. Final location: **A)** Outer Bay  
1060 (OC and I→O) and **B)** Inner Bay (IC and O→I). PERMANOVA analysis-identified  
1061 sample location, month, and interaction terms are significant factors in  
1062 determining the *Acropora muricata* microbiome. LefSe results based differentially  
1063 abundant zOTUs over sample groups in the **C)** Outer Bay (OC and I→O) and **D)**  
1064 Inner Bay (IC and O→I). zOTUs above the dotted red lines are differentially  
1065 abundant in control (OC and IC) and the ones below are differentially abundant in  
1066 transplant samples (I→O and O→I)

1067 **Figure 4. Phylogenetic tree and genome map of *Candidatus Endozoicomonas***  
1068 **penghunesis 4G. A)** Phylogenetic tree of dominant zOTUs and 16S rRNA  
1069 sequences of *Ca. E. penghunesis* (Copy1) and *Endozoicomonas acroporae* Acr-14<sup>T</sup>.  
1070 Horizontal bars denote the relative abundance of selective zOTUs in the Inner  
1071 (Green) and Outer Bay (Brown). The percent values denote the percentage  
1072 identity between the zOTU and cultured 16S rRNA copy, with “#” corresponding  
1073 to *Ca. E. penghunesis* and “\*” to *E. acroporae* Acr-14<sup>T</sup>. Shaded regions are  
1074 considered to belong to one bacterial species. **B)** Whole-genome map of *Ca. E.*  
1075 *penghunesis* 4G drawn in CGViewer with concentric circles depicting distinct  
1076 features. The map also highlights the concentration of WD40 domain proteins,  
1077 Siroheme-dependent anaerobic sulfite reduction operon, and Glycine-betaine  
1078 biosynthesis and transport pathways.

1079

A

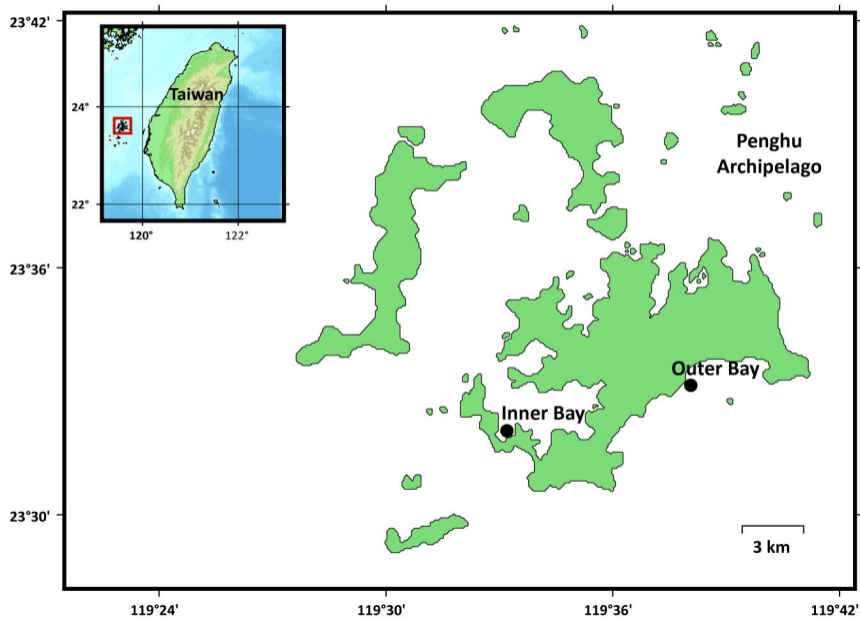

B

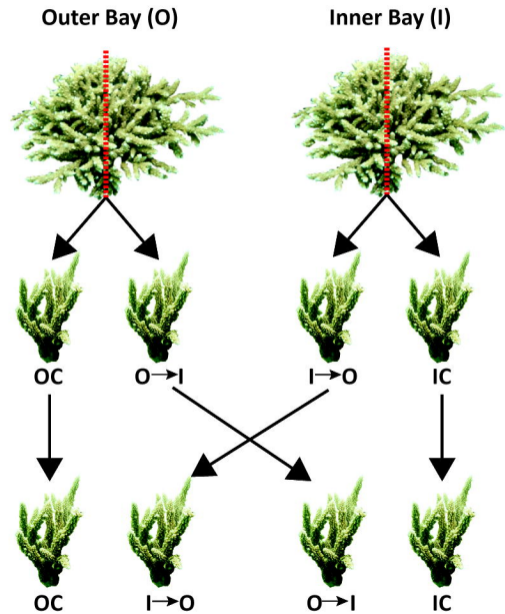

A

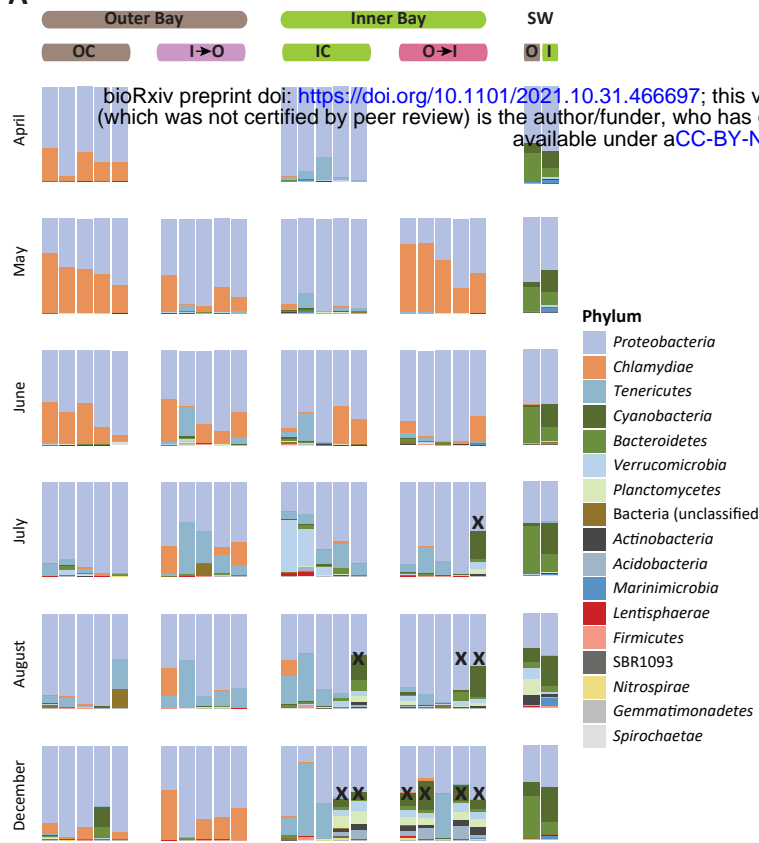

B

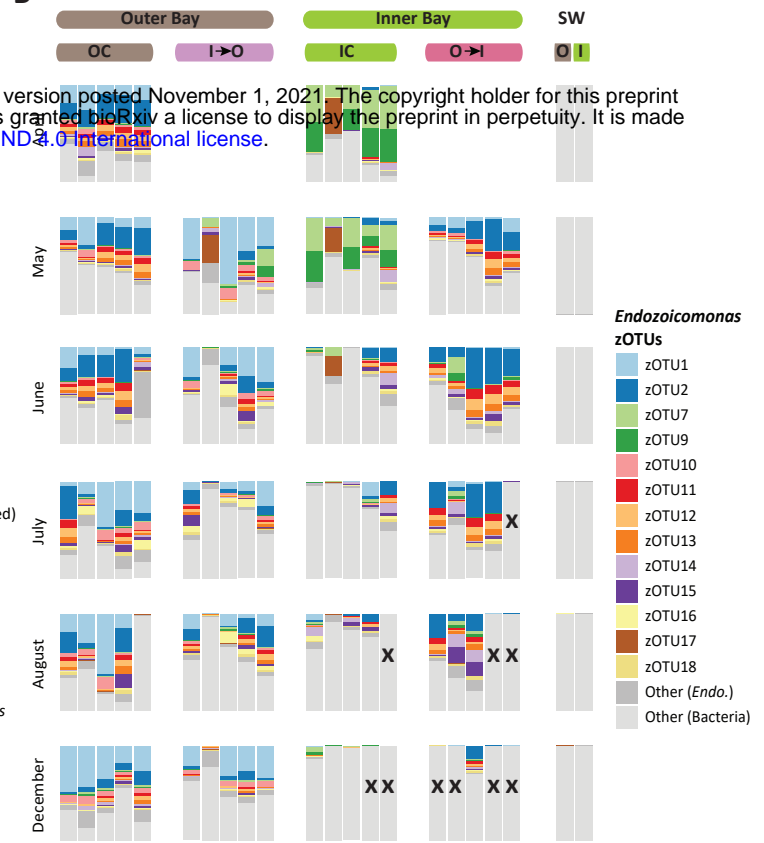

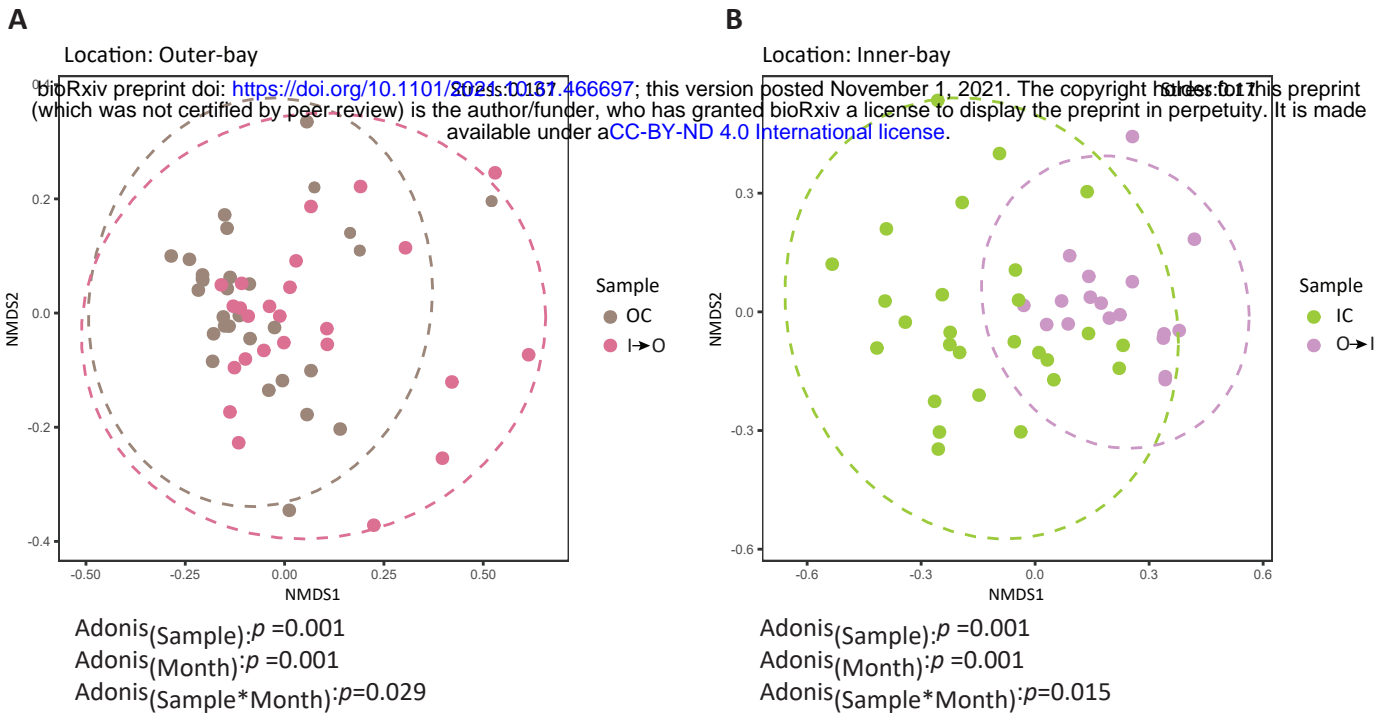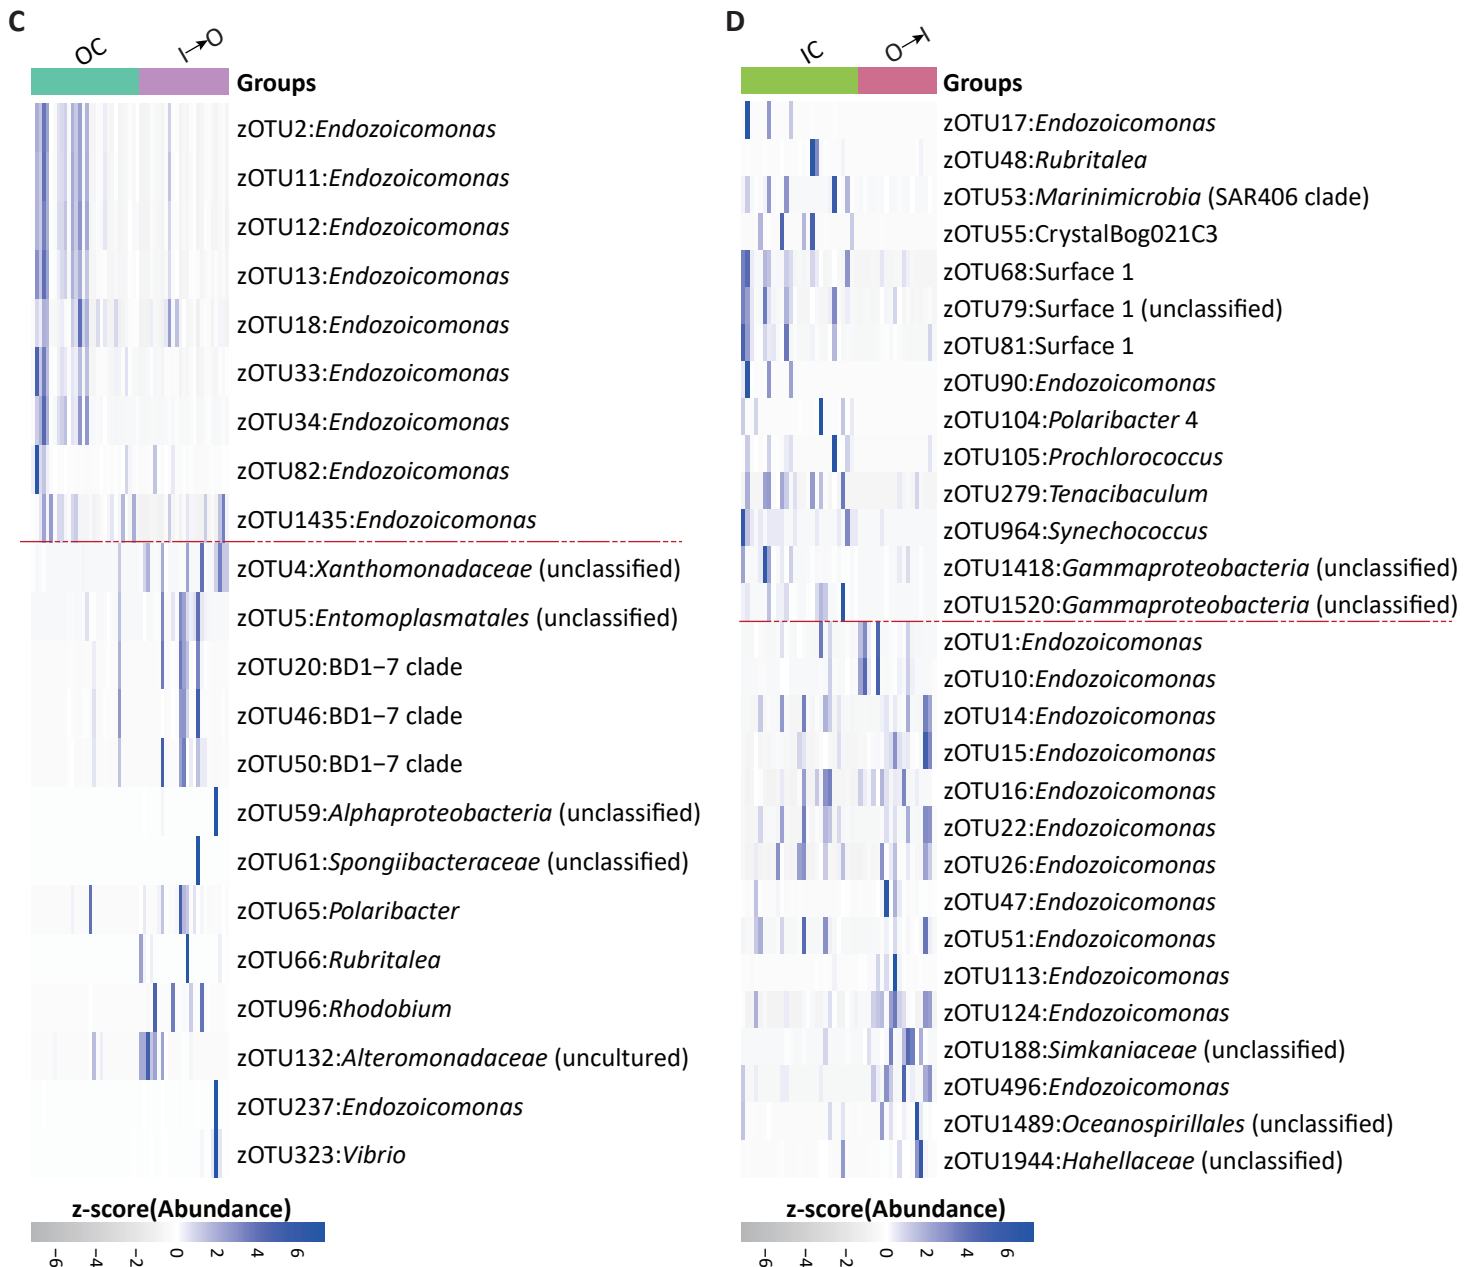

A

bioRxiv preprint doi: <https://doi.org/10.1101/2021.10.31.466697>; this version posted November 1, 2021. The copyright holder for this preprint (which was not certified by peer review) is the author/funder, who has granted bioRxiv a license to display the preprint in perpetuity. It is made available under aCC-BY-ND 4.0 International license.

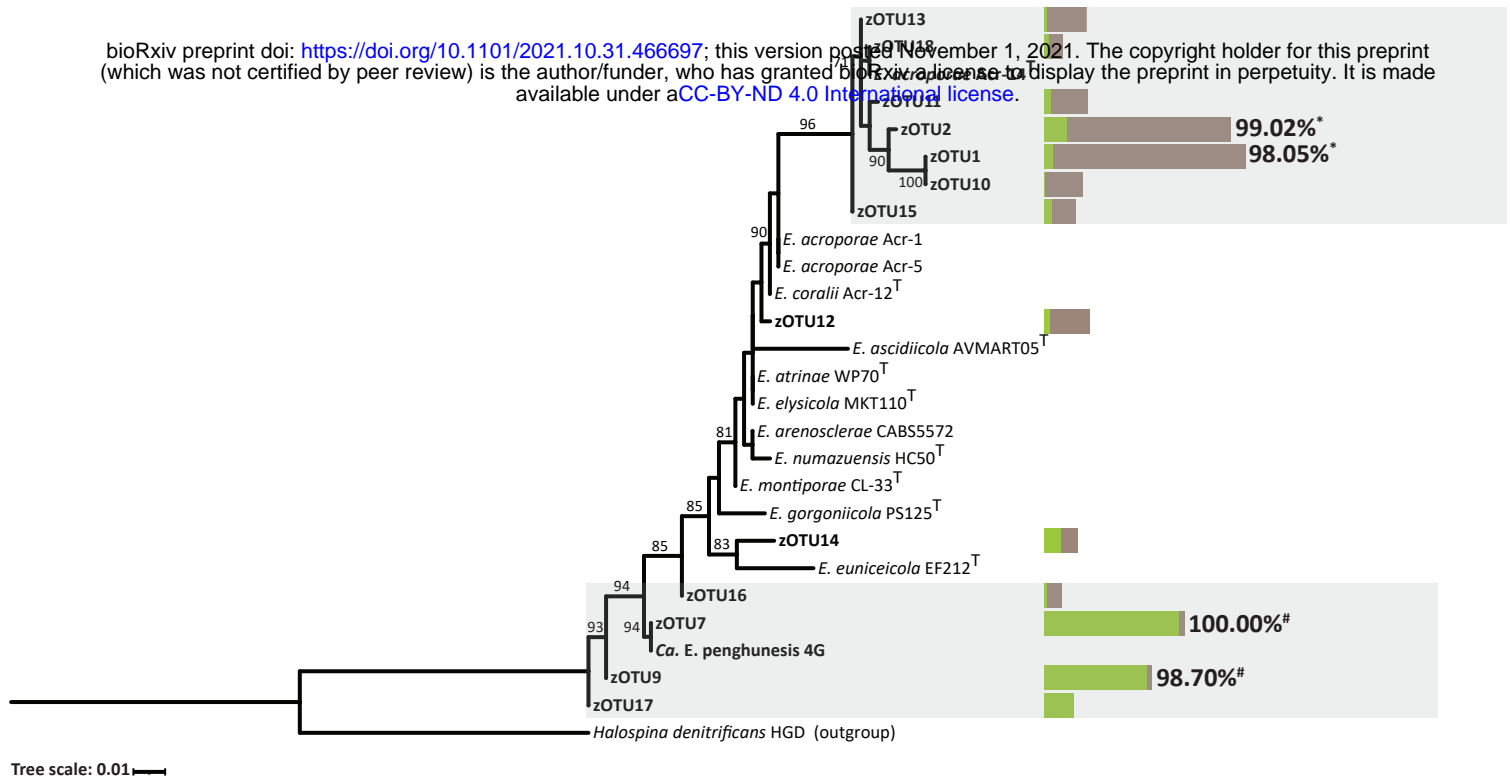

B

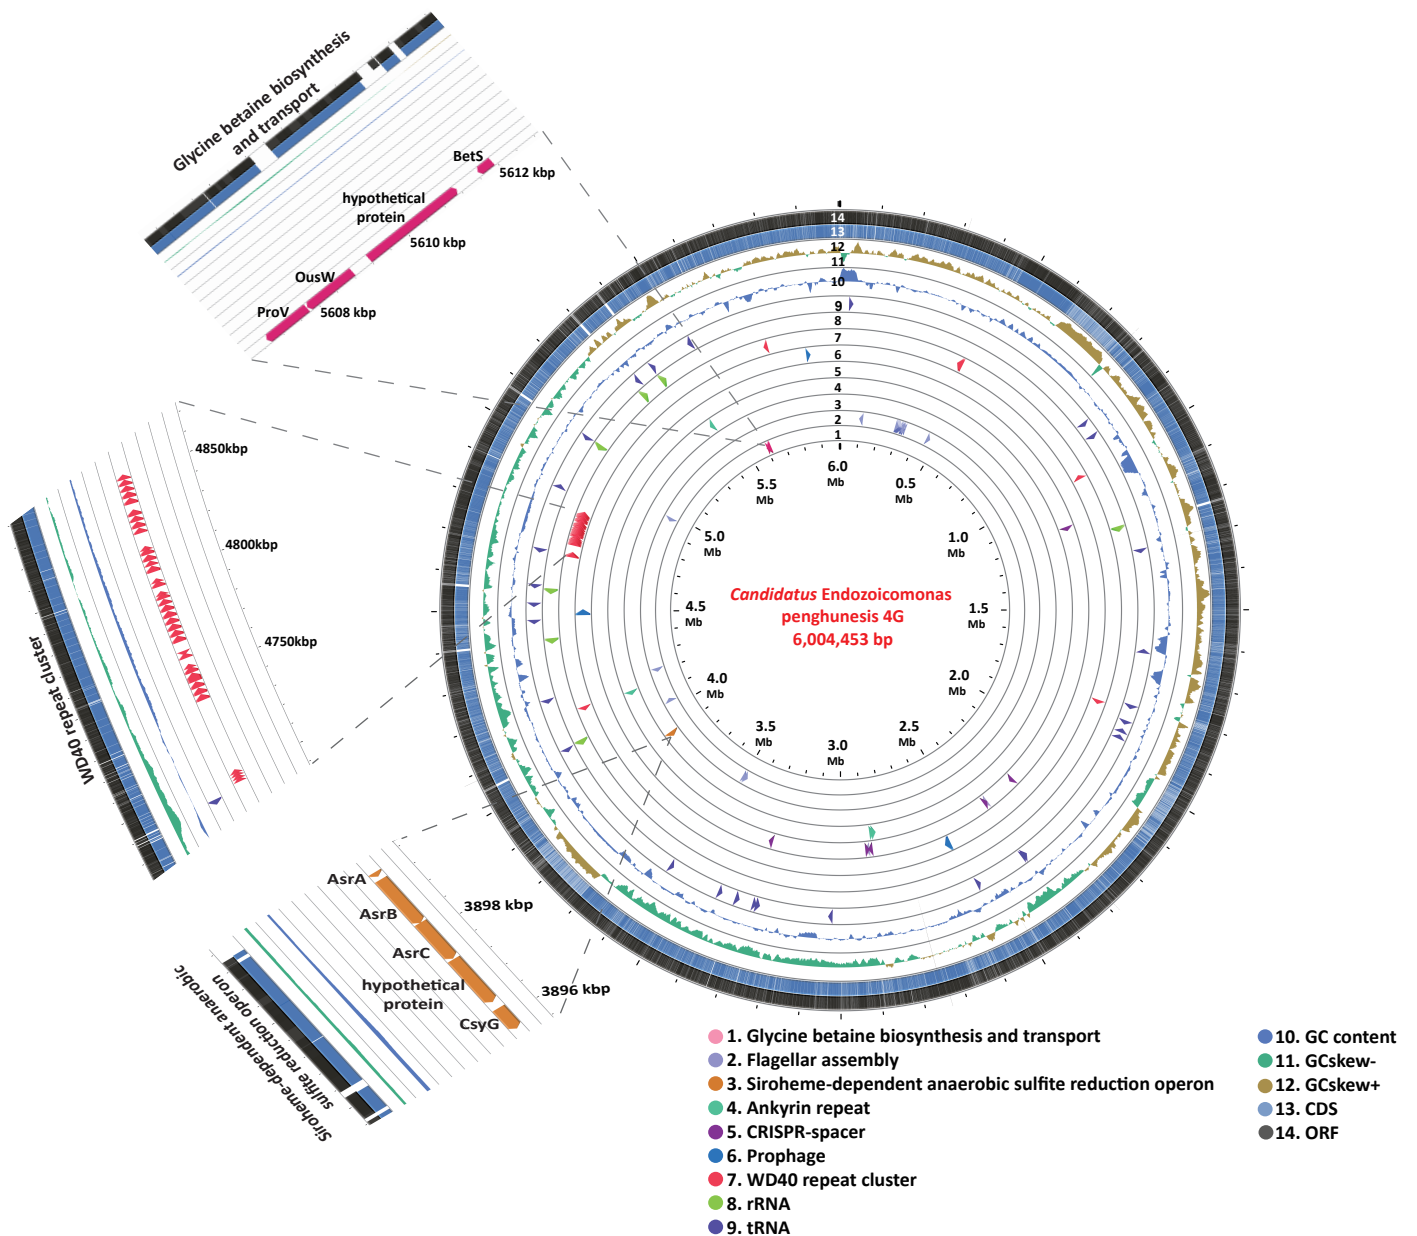

Source: https://www.biorxiv.org/content/biorxiv/early/2021/11/01/2021.10.31.466697.full.pdf
